# Supplementary material
Source: ML conference proceedings conference paper supplement (https://openreview.net/forum?id=PFRWGeUhJx)
Supplement: supplementary_material [file attachment]

# COMPARISONS ARE ALL YOU NEED FOR OPTIMIZING SMOOTH FUNCTIONS

Anonymous authors

Paper under double-blind review

## ABSTRACT

When optimizing machine learning models, there are various scenarios where gradient computations are challenging or even infeasible. Furthermore, in reinforcement learning (RL), preference-based RL that only compares between options has wide applications, including reinforcement learning with human feedback in large language models. In this paper, we systematically study optimization of a smooth function  $f: \mathbb{R}^n \rightarrow \mathbb{R}$  only assuming an oracle that compares function values at two points and tells which is larger. When  $f$  is convex, we give two algorithms using  $\tilde{O}(n/\epsilon)$  and  $\tilde{O}(n^2)$  comparison queries to find an  $\epsilon$ -optimal solution, respectively. When  $f$  is nonconvex, our algorithm uses  $\tilde{O}(n/\epsilon^2)$  comparison queries to find an  $\epsilon$ -approximate stationary point. All these results match the best-known zeroth-order algorithms with function evaluation queries in  $n$  dependence, thus suggesting that *comparisons are all you need for optimizing smooth functions using derivative-free methods*. In addition, we also give an algorithm for escaping saddle points and reaching an  $\epsilon$ -second order stationary point of a nonconvex  $f$ , using  $\tilde{O}(n^{1.5}/\epsilon^{2.5})$  comparison queries.

## 1 INTRODUCTION

Optimization is pivotal in the realm of machine learning. For instance, advancements in stochastic gradient descent (SGD) such as ADAM (Kingma & Ba, 2015), Adagrad (Duchi et al., 2011), etc., serve as foundational methods for the training of deep neural networks. However, there exist scenarios where gradient computations are challenging or even infeasible, such as black-box adversarial attack on neural networks (Papernot et al., 2017; Madry et al., 2018; Chen et al., 2017) and policy search in reinforcement learning (Salimans et al., 2017; Choromanski et al., 2018). Consequently, zeroth-order optimization methods with function evaluations have gained prominence, with provable guarantee for convex optimization (Duchi et al., 2015; Nesterov & Spokoiny, 2017) and nonconvex optimization (Ghadimi & Lan, 2013; Fang et al., 2018; Jin et al., 2018a; Ji et al., 2019; Zhang et al., 2022; Vlatakis-Gkaragkounis et al., 2019; Balasubramanian & Ghadimi, 2022).

Furthermore, optimization for machine learning has been recently soliciting for even less information. For instance, it is known that taking only signs of gradient descents still enjoy good performance (Liu et al., 2019; Li et al., 2023; Bernstein et al., 2018). Moreover, in the breakthrough of large language models (LLMs), reinforcement learning from human feedback (RLHF) played an important rule in training these LLMs, especially GPTs by OpenAI (Ouyang et al., 2022). Compared to standard RL that applies function evaluation for rewards, RLHF is preference-based RL that only compares between options and tells which is better. There is emerging research interest in preference-based RL, where various works have established provable guarantees for learning a near-optimal policy from preference feedback (Chen et al., 2022; Saha et al., 2023; Novoseller et al., 2020; Xu et al., 2020; Zhu et al., 2023; Tang et al., 2023). Furthermore, Wang et al. (2023) proved that for a wide range of preference models, preference-based RL can be solved with small or no extra costs compared to those of standard reward-based RL.

In this paper, we systematically study optimization of smooth functions using comparisons. Specifically, for a function  $f: \mathbb{R}^n \rightarrow \mathbb{R}$ , we define the *comparison oracle* of  $f$  as  $O_f^{\text{Comp}}: \mathbb{R}^n \times \mathbb{R}^n \rightarrow$

$\{-1, 1\}$  such that

$$O_f^{\text{Comp}}(\mathbf{x}, \mathbf{y}) = \begin{cases} 1 & \text{if } f(\mathbf{x}) \geq f(\mathbf{y}) \\ -1 & \text{if } f(\mathbf{x}) \leq f(\mathbf{y}) \end{cases}. \quad (1)$$

(When  $f(\mathbf{x}) = f(\mathbf{y})$ , outputting either 1 or  $-1$  is okay.) We consider an  $L$ -smooth function  $f: \mathbb{R}^n \rightarrow \mathbb{R}$ , defined as

$$\|\nabla f(\mathbf{x}) - \nabla f(\mathbf{y})\| \leq L\|\mathbf{x} - \mathbf{y}\| \quad \forall \mathbf{x}, \mathbf{y} \in \mathbb{R}^n.$$

Furthermore, we say  $f$  is  $\rho$ -Hessian Lipschitz if

$$\|\nabla^2 f(\mathbf{x}) - \nabla^2 f(\mathbf{y})\| \leq \rho\|\mathbf{x} - \mathbf{y}\| \quad \forall \mathbf{x}, \mathbf{y} \in \mathbb{R}^n.$$

In terms of the goal of optimization, we define:

- $\mathbf{x} \in \mathbb{R}^n$  is an  $\epsilon$ -optimal point if  $f(\mathbf{x}) \leq f^* + \epsilon$ , where  $f^* := \inf_{\mathbf{x}} f(\mathbf{x})$ .
- $\mathbf{x} \in \mathbb{R}^n$  is an  $\epsilon$ -first-order stationary point ( $\epsilon$ -FOSP) if  $\|\nabla f(\mathbf{x})\| \leq \epsilon$ .
- $\mathbf{x} \in \mathbb{R}^n$  is an  $\epsilon$ -second-order stationary point ( $\epsilon$ -SOSP) if  $\|\nabla f(\mathbf{x})\| \leq \epsilon$  and  $\lambda_{\min}(\nabla^2 f(\mathbf{x})) \geq -\sqrt{\rho\epsilon}$ .<sup>1</sup>

**Our main results** can be listed as follows:

- For an  $L$ -smooth convex  $f$ , Theorem 2 finds an  $\epsilon$ -optimal point in  $O(nL/\epsilon \log(nL/\epsilon))$  comparisons.
- For an  $L$ -smooth convex  $f$ , Theorem 3 finds an  $\epsilon$ -optimal point in  $O(n^2 \log(nL/\epsilon))$  comparisons.
- For an  $L$ -smooth  $f$ , Theorem 4 finds an  $\epsilon$ -FOSP using  $O(Ln \log n/\epsilon^2)$  comparisons.
- For an  $L$ -smooth,  $\rho$ -Hessian Lipschitz  $f$ , Theorem 5 finds an  $\epsilon$ -SOSP in  $\tilde{O}(n^{1.5}/\epsilon^{2.5})$  comparisons.

Intuitively, our results can be described as **comparisons are all you need for derivative-free methods**: For finding an approximate minimum of a convex function, the state-of-the-art zeroth-order methods with full function evaluations have query complexities  $O(n/\sqrt{\epsilon})$  (Nesterov & Spokoiny, 2017) or  $\tilde{O}(n^2)$  (Lee et al., 2018), which are matched in  $n$  by our Theorem 2 and Theorem 3 using comparisons, respectively. For finding an approximate stationary point of a nonconvex function, the state-of-the-art zeroth-order result has query complexity  $O(n/\epsilon^2)$  (Fang et al., 2018), which is matched by our Theorem 4 up to a logarithmic factor. In other words, in derivative-free scenarios for optimizing smooth functions, function values per se are unimportant but their comparisons, which indicate the direction that the function decreases.

Among the literature for derivative-free optimization methods (Larson et al., 2019), direct search methods by Kolda et al. (2003) proceed by comparing function values, including the directional direct search method (Audet & Dennis Jr, 2006) and the Nelder-Mead method (Nelder & Mead, 1965) as examples. However, the directional direct search method does not have a known rate of convergence, meanwhile the Nelson-Mead method may fail to converge to a stationary point for smooth functions (Dennis & Torczon, 1991). As far as we know, the most relevant result is by Bergou et al. (2020), which proposed the stochastic three points (STP) method and found an  $\epsilon$ -optimal point of a convex function and an  $\epsilon$ -FOSP of a nonconvex function in  $\tilde{O}(n/\epsilon)$  and  $\tilde{O}(n/\epsilon^2)$  comparisons, respectively. STP also has a version with momentum (Gorbunov et al., 2020). Our Theorem 2 and Theorem 4 can be seen as rediscoveries of these results using different methods. In addition, literature on dueling convex optimization also achieves  $\tilde{O}(n/\epsilon)$  for finding an  $\epsilon$ -optimal point of a convex function (Saha et al., 2021; 2022). However, for comparison-based convex optimization with  $\text{poly}(\log 1/\epsilon)$  dependence, Jamieson et al. (2012) achieved this for strongly convex functions, and the state-of-the-art result for general convex optimization by Karabag et al. (2021) takes  $\tilde{O}(n^4)$  comparison queries. Their algorithm applies the ellipsoid method, which has  $\tilde{O}(n^2)$  iterations and each iteration takes  $\tilde{O}(n^2)$  comparisons to construct the ellipsoid. This  $\tilde{O}(n^4)$  bound is noticeably worse than our Theorem 3. As far as we know, our Theorem 5 is the *first provable guarantee* for finding an  $\epsilon$ -SOSP of a nonconvex function by comparisons.

<sup>1</sup>This is a standard definition among nonconvex optimization literature for escaping saddle points and reaching approximate second-order stationary points, see for instance (Nesterov & Polyak, 2006; Curtis et al., 2017; Agarwal et al., 2017; Carmon et al., 2018; Jin et al., 2018b; Allen-Zhu & Li, 2018; Xu et al., 2018; Zhang et al., 2022; Zhang & Gu, 2023).

**Techniques.** Our first technical contribution is Theorem 1, which for a point  $\mathbf{x}$  estimates the direction of  $\nabla f(\mathbf{x})$  within precision  $\delta$ . This is achieved by Algorithm 2, named as `Comparison-GDE` (GDE is the acronym for gradient direction estimation). It is built upon a directional preference subroutine (Algorithm 1), which inputs a unit vector  $\mathbf{v} \in \mathbb{R}^n$  and a precision parameter  $\Delta > 0$ , and outputs whether  $\langle \nabla f(\mathbf{x}), \mathbf{v} \rangle \geq -\Delta$  or  $\langle \nabla f(\mathbf{x}), \mathbf{v} \rangle \leq \Delta$  using the value of the comparison oracle for  $O_f^{\text{Comp}}(\mathbf{x} + \frac{2\Delta}{L}\mathbf{v}, \mathbf{x})$ . `Comparison-GDE` then has three phases:

- First, it sets  $\mathbf{v}$  to be all standard basis directions  $\mathbf{e}_i$  to determine the signs of all  $\nabla_i f(\mathbf{x})$  (up to  $\Delta$ ).
- It then sets  $\mathbf{v}$  as  $\frac{1}{\sqrt{2}}(\mathbf{e}_i - \mathbf{e}_j)$ , which can determine whether  $|\nabla_i f(\mathbf{x})|$  or  $|\nabla_j f(\mathbf{x})|$  is larger (up to  $\Delta$ ). Start with  $\mathbf{e}_1$  and  $\mathbf{e}_2$  and keep iterating to find the  $i^*$  with the largest  $|\frac{\partial}{\partial i^*} \nabla f(\mathbf{x})|$  (up to  $\Delta$ ).
- Finally, for each  $i \neq i^*$ , It then sets  $\mathbf{v}$  to have form  $\frac{1}{\sqrt{1+\alpha_i^2}}(\alpha_i \mathbf{e}_{i^*} - \mathbf{e}_i)$  and applies binary search to find the value for  $\alpha_i$  such that  $\alpha_i |\nabla_{i^*} f(\mathbf{x})|$  equals to  $|\nabla_i f(\mathbf{x})|$  up to enough precision.

`Comparison-GDE` outputs  $\alpha/\|\alpha\|$  for GDE, where  $\alpha = (\alpha_1, \dots, \alpha_n)^\top$ . It in total uses  $O(n \log(n/\delta))$  comparison queries, with the main cost coming from binary searches in the last step (the first two steps both take  $\leq n$  comparisons).

We then leverage `Comparison-GDE` for solving various optimization problems. In convex optimization, we develop two algorithms that find an  $\epsilon$ -optimal point separately in Section 3.1 and Section 3.2. Our first algorithm is a specialization of the adaptive version of normalized gradient descent (NGD) introduced in Levy (2017), where we replace the normalized gradient query in their algorithm by `Comparison-GDE`. It is a natural choice to apply gradient estimation to normalized gradient descent, given that the comparison model only allows us to estimate the gradient direction without providing information about its norm. Note that Bergou et al. (2020) also discussed NGD, but their algorithm using NGD still needs the full gradient and cannot be directly implemented by comparisons. Our second algorithm builds upon the framework of cutting plane methods, where we show that the output of `Comparison-GDE` is a valid separation oracle, as long as it is accurate enough. Moreover, we note that Cai et al. (2022) also studied gradient estimation by comparisons and combined that with inexact NGD, but their complexity  $\tilde{O}(d/\epsilon^{1.5})$  is suboptimal compared to ours.

In nonconvex optimization, we develop two algorithms that find an  $\epsilon$ -FOSP and an  $\epsilon$ -SOSP, respectively, in Section 4.1 and Section 4.2. Our algorithm for finding an  $\epsilon$ -FOSP is a specialization of the NGD algorithm, where the normalized gradient is given by `Comparison-GDE`. Our algorithm for finding an  $\epsilon$ -SOSP uses a similar approach as corresponding first-order methods by Allen-Zhu & Li (2018); Xu et al. (2018) and proceeds in rounds, where we alternately apply NGD and negative curvature descent to ensure that the function value will have a large decrease if more than  $1/9$  of the iterations in this round are not  $\epsilon$ -SOSP. The normalized gradient descent part is essentially the same as our algorithm for  $\epsilon$ -FOSP in Section 4.1. The negative curvature descent part with comparison information, however, is much more technically involved. In particular, previous first-order methods (Allen-Zhu & Li, 2018; Xu et al., 2018; Zhang & Li, 2021) all contains a subroutine that can find a negative curvature direction near a saddle point  $\mathbf{x}$  with  $\lambda_{\min}(\nabla^2 f(\mathbf{x})) \leq -\sqrt{\rho\epsilon}$ . One crucial step in this subroutine is to approximate the Hessian-vector product  $\nabla^2 f(\mathbf{x}) \cdot \mathbf{y}$  for some unit vector  $\mathbf{y} \in \mathbb{R}^n$  by taking the difference between  $\nabla f(\mathbf{x} + r\mathbf{y})$  and  $\nabla f(\mathbf{x})$ , where  $r$  is a very small parameter. However, this is infeasible in the comparison model which only allows us to estimate the gradient direction without providing information about its norm. Instead, we find the directions of  $\nabla f(\mathbf{x})$ ,  $\nabla f(\mathbf{x} + r\mathbf{y})$ , and  $\nabla f(\mathbf{x} - r\mathbf{y})$  by `Comparison-GDE`, and we determine the direction of  $\nabla f(\mathbf{x} + r\mathbf{y}) - \nabla f(\mathbf{x})$  using the fact that its intersection with  $\nabla f(\mathbf{x})$  and  $\nabla f(\mathbf{x} + r\mathbf{y})$  as well as its intersection with  $\nabla f(\mathbf{x})$  and  $\nabla f(\mathbf{x} - r\mathbf{y})$  give two segments of same length (see Figure 1).

**Open questions.** Our work leaves several natural directions for future investigation:

- Can we give comparison-based optimization algorithms based on accelerated gradient descent (AGD) methods? This is challenging because AGD requires carefully chosen step sizes, but with comparisons we can only learn gradient directions but not the norm of gradients. This is also the main reason why the  $1/\epsilon$  dependence in our Theorem 2 and Theorem 5 are worse than Nesterov & Spokoiny (2017) and Zhang & Gu (2023) with evaluations in their respective settings.

Figure 1: The intuition of Algorithm 10 for computing Hessian-vector products using gradient directions.

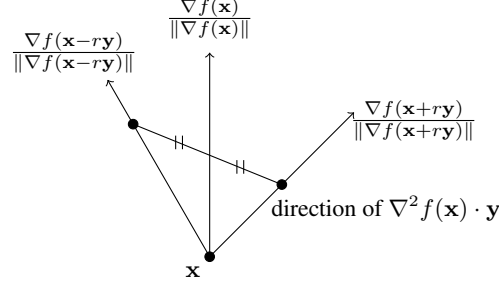

- Can we improve our result for finding second-order stationary points in nonconvex optimization? Compared to gradient-based methods that choose the step size in negative curvature finding (Allen-Zhu & Li, 2018; Xu et al., 2018), our comparison-based perturbed normalized gradient descent (Algorithm 5) can only utilize gradient directions but have no information about gradient norms, resulting in a fixed and conservative step size and in total  $\tilde{O}(\sqrt{n}/\epsilon)$  iterations.
- Can we apply our algorithms to machine learning? Tang et al. (2023) made attempts on preference-based RL, and it is worth further exploring whether we can prove more theoretical results for preference-based RL and other machine learning settings. It would be also of general interest to see if our results can provide theoretical justification for quantization in neural networks (Gholami et al., 2022).

**Notations.** We use bold letters, e.g.,  $\mathbf{x}$ ,  $\mathbf{y}$ , to denote vectors and capital letters, e.g.,  $A$ ,  $B$ , to denote matrices. We use  $\|\cdot\|$  to denote the Euclidean norm ( $\ell_2$ -norm) and denote  $\mathcal{S}^{n-1}$  to be the  $n$ -dimensional sphere with radius 1, i.e.,  $\mathcal{S}^{n-1} := \{\mathbf{x} \in \mathbb{R}^n : \|\mathbf{x}\| = 1\}$ . We denote  $\mathbb{B}_R(\mathbf{x}) := \{\mathbf{y} \in \mathbb{R}^n : \|\mathbf{y} - \mathbf{x}\| \leq R\}$  and  $[T] := \{0, 1, \dots, T\}$ . For a convex set  $\mathcal{K} \subseteq \mathbb{R}^n$ , its diameter is defined as  $D := \sup_{\mathbf{x}, \mathbf{y} \in \mathcal{K}} \|\mathbf{x} - \mathbf{y}\|$  and its projection operator  $\Pi_{\mathcal{K}}$  is defined as

$$\Pi_{\mathcal{K}}(\mathbf{x}) := \operatorname{argmin}_{\mathbf{y} \in \mathcal{K}} \|\mathbf{x} - \mathbf{y}\|, \quad \forall \mathbf{x} \in \mathbb{R}^n.$$

## 2 ESTIMATION OF GRADIENT DIRECTION BY COMPARISONS

First, we show that given a point  $\mathbf{x} \in \mathbb{R}^n$  and a direction  $\mathbf{v} \in \mathbb{R}^n$ , we can use one comparison query to understand whether the inner product  $\langle \nabla f(\mathbf{x}), \mathbf{v} \rangle$  is roughly positive or negative. Intuitively, this inner product determines whether  $\mathbf{x} + \mathbf{v}$  is following or against the direction of  $\nabla f(\mathbf{x})$ , also known as *directional preference* (DP) in Karabag et al. (2021).

**Lemma 1.** *Given a point  $\mathbf{x} \in \mathbb{R}^n$ , a unit vector  $\mathbf{v} \in \mathbb{B}_1(0)$ , and precision  $\Delta > 0$  for directional preference. Then Algorithm 1 is correct:*

- If  $O_f^{\text{Comp}}(\mathbf{x} + \frac{2\Delta}{L}\mathbf{v}, \mathbf{x}) = 1$ , then  $\langle \nabla f(\mathbf{x}), \mathbf{v} \rangle \geq -\Delta$ .
- If  $O_f^{\text{Comp}}(\mathbf{x} + \frac{2\Delta}{L}\mathbf{v}, \mathbf{x}) = -1$ , then  $\langle \nabla f(\mathbf{x}), \mathbf{v} \rangle \leq \Delta$ .

---

### Algorithm 1: DP( $\mathbf{x}, \mathbf{v}, \Delta$ )

---

**Input:** Comparison oracle  $O_f^{\text{Comp}}$  of  $f: \mathbb{R}^n \rightarrow \mathbb{R}$ ,  $\mathbf{x} \in \mathbb{R}^n$ , unit vector  $\mathbf{v} \in \mathbb{B}_1(0)$ ,  $\Delta > 0$

- 1 **if**  $O_f^{\text{Comp}}(\mathbf{x} + \frac{2\Delta}{L}\mathbf{v}, \mathbf{x}) = 1$  **then**
  - 2     **return** " $\langle \nabla f(\mathbf{x}), \mathbf{v} \rangle \geq -\Delta$ "
  - 3 **else** (in this case  $O_f^{\text{Comp}}(\mathbf{x} + \frac{2\Delta}{L}\mathbf{v}, \mathbf{x}) = -1$ )
  - 4     **return** " $\langle \nabla f(\mathbf{x}), \mathbf{v} \rangle \leq \Delta$ "
-

*Proof.* Since  $f$  is an  $L$ -smooth differentiable function,

$$|f(\mathbf{y}) - f(\mathbf{x}) - \langle \nabla f(\mathbf{x}), \mathbf{y} - \mathbf{x} \rangle| \leq \frac{1}{2}L\|\mathbf{y} - \mathbf{x}\|^2$$

for any  $\mathbf{x}, \mathbf{y} \in \mathbb{R}^n$ . Take  $\mathbf{y} = \mathbf{x} + \frac{2\Delta}{L}\mathbf{v}$ , this gives

$$\left| f(\mathbf{y}) - f(\mathbf{x}) - \frac{2\Delta}{L} \langle \nabla f(\mathbf{x}), \mathbf{v} \rangle \right| \leq \frac{1}{2}L \left( \frac{2\Delta}{L} \right)^2 = \frac{2\Delta^2}{L}.$$

Therefore, if  $O_f^{\text{Comp}}(\mathbf{y}, \mathbf{x}) = 1$ , i.e.,  $f(\mathbf{y}) \geq f(\mathbf{x})$ ,

$$\frac{2\Delta}{L} \langle \nabla f(\mathbf{x}), \mathbf{v} \rangle \geq \frac{2\Delta}{L} \langle \nabla f(\mathbf{x}), \mathbf{v} \rangle + f(\mathbf{x}) - f(\mathbf{y}) \geq -\frac{2\Delta^2}{L}$$

and hence  $\langle \nabla f(\mathbf{x}), \mathbf{v} \rangle \geq -\Delta$ . On the other hand, if  $O_f^{\text{Comp}}(\mathbf{y}, \mathbf{x}) = -1$ , i.e.,  $f(\mathbf{y}) \leq f(\mathbf{x})$ ,

$$\frac{2\Delta}{L} \langle \nabla f(\mathbf{x}), \mathbf{v} \rangle \leq f(\mathbf{y}) - f(\mathbf{x}) + \frac{2\Delta^2}{L} \leq \frac{2\Delta^2}{L}$$

and hence  $\langle \nabla f(\mathbf{x}), \mathbf{v} \rangle \leq \Delta$ .  $\square$

Now, we prove that we can use  $\tilde{O}(n)$  comparison queries to approximate the direction of the gradient at a point, which is one of our main technical contributions.

**Theorem 1.** For an  $L$ -smooth function  $f: \mathbb{R}^n \rightarrow \mathbb{R}$  and a point  $\mathbf{x} \in \mathbb{R}^n$ , Algorithm 2 outputs an estimate  $\tilde{\mathbf{g}}(\mathbf{x})$  of the direction of  $\nabla f(\mathbf{x})$  using  $O(n \log(n/\delta))$  queries to the comparison oracle  $O_f^{\text{Comp}}$  of  $f$  (Eq. (1)) that satisfies

$$\left\| \tilde{\mathbf{g}}(\mathbf{x}) - \frac{\nabla f(\mathbf{x})}{\|\nabla f(\mathbf{x})\|} \right\| \leq \delta$$

if we are given a parameter  $\gamma > 0$  such that  $\|\nabla f(\mathbf{x})\| \geq \gamma$ .

*Proof.* The correctness of (2) and (3) follows directly from the arguments in Line 2 and Line 3, respectively. For Line 6, since  $\alpha_i \leq 1$  for any  $i \in [n]$ , the binary search can be regarded as having bins with interval lengths  $\sqrt{1 + \alpha_i^2} \Delta \leq \sqrt{2} \Delta$ , and when the binary search ends Eq. (4) is satisfied. Furthermore, Eq. (4) can be written as

$$\left| \alpha_i - \frac{g_i}{g_{i^*}} \right| \leq \frac{\sqrt{2}\Delta}{g_{i^*}} \leq \frac{2\Delta\sqrt{n}}{\gamma}.$$

This is because  $\|\nabla f(\mathbf{x})\| = \|(g_1, \dots, g_n)^\top\| \geq \gamma$  implies  $\max_{i \in [n]} g_i \geq \gamma/\sqrt{n}$ , and together with (3) we have  $g_{i^*} \geq \gamma/\sqrt{n} - \sqrt{2}\Delta \geq \gamma/\sqrt{2n}$  because  $\Delta \leq \gamma/4\sqrt{n}$ .

We now estimate  $\left\| \tilde{\mathbf{g}}(\mathbf{x}) - \frac{\nabla f(\mathbf{x})}{\|\nabla f(\mathbf{x})\|} \right\|$ . Note  $\frac{\nabla f(\mathbf{x})}{\|\nabla f(\mathbf{x})\|} = \frac{\nabla f(\mathbf{x})/g_{i^*}}{\|\nabla f(\mathbf{x})/g_{i^*}\|}$  and  $\tilde{\mathbf{g}}(\mathbf{x}) = \boldsymbol{\alpha}/\|\boldsymbol{\alpha}\|$ . Moreover

$$\left\| \boldsymbol{\alpha} - \frac{\nabla f(\mathbf{x})}{g_{i^*}} \right\| \leq \sum_{i=1}^n \left| \alpha_i - \frac{g_i}{g_{i^*}} \right| \leq \frac{2\Delta\sqrt{n}(n-1)}{\gamma}.$$

By Lemma 5 for bounding distance between normalized vectors) and the fact that  $\|\boldsymbol{\alpha}\| \geq 1$ ,

$$\left\| \tilde{\mathbf{g}}(\mathbf{x}) - \frac{\nabla f(\mathbf{x})}{\|\nabla f(\mathbf{x})\|} \right\| = \left\| \frac{\boldsymbol{\alpha}}{\|\boldsymbol{\alpha}\|} - \frac{\nabla f(\mathbf{x})/g_{i^*}}{\|\nabla f(\mathbf{x})/g_{i^*}\|} \right\| \leq \frac{4\Delta n^{3/2}}{\gamma} \leq \delta.$$

Thus the correctness has been established. For the query complexity, Line 2 takes  $n$  queries, Line 3 takes  $n-1$  queries, and Line 6 throughout the for loop takes  $(n-1)\lceil \log_2(\gamma/\sqrt{2}\Delta) + 1 \rceil = O(n \log(n/\delta))$  queries to the comparison oracle, given that each  $\alpha_i$  is within the range of  $[0, 1]$  and we approximate it to accuracy  $\sqrt{2}\Delta/g_{i^*} \geq \sqrt{2}\Delta/\gamma$ . This finishes the proof.  $\square$

**Algorithm 2:** Comparison-based Gradient Direction Estimation (Comparison-GDE( $\mathbf{x}, \delta, \gamma$ ))**Input:** Comparison oracle  $O_f^{\text{Comp}}$  of  $f: \mathbb{R}^n \rightarrow \mathbb{R}$ , precision  $\delta$ , lower bound  $\gamma$  on  $\|\nabla f(\mathbf{x})\|$ 

- 1 Set  $\Delta \leftarrow \delta\gamma/4n^{3/2}$ . Denote  $\nabla f(\mathbf{x}) = (g_1, \dots, g_n)^\top$
- 2 Call Algorithm 1 with inputs  $(\mathbf{x}, \mathbf{e}_1, \Delta), \dots, (\mathbf{x}, \mathbf{e}_n, \Delta)$  where  $\mathbf{e}_i$  is the  $i^{\text{th}}$  standard basis with  $i^{\text{th}}$  coordinate being 1 and others being 0. This determines whether  $g_i \geq -\Delta$  or  $g_i \leq \Delta$  for each  $i \in [n]$ . WLOG

$$g_i \geq -\Delta \quad \forall i \in [n] \quad (2)$$

(otherwise take a minus sign for the  $i^{\text{th}}$  coordinate)

- 3 We next find the approximate largest one among  $g_1, \dots, g_n$ . Call Algorithm 1 with input  $(\mathbf{x}, \frac{1}{\sqrt{2}}(\mathbf{e}_1 - \mathbf{e}_2), \Delta)$ . This determines whether  $g_1 \geq g_2 - \sqrt{2}\Delta$  or  $g_2 \geq g_1 - \sqrt{2}\Delta$ . If the former, call Algorithm 1 with input  $(\mathbf{x}, \frac{1}{\sqrt{2}}(\mathbf{e}_1 - \mathbf{e}_3), \Delta)$ . If the later, call Algorithm 1 with input  $(\mathbf{x}, \frac{1}{\sqrt{2}}(\mathbf{e}_2 - \mathbf{e}_3), \Delta)$ . Iterate this until  $\mathbf{e}_n$ , we find the  $i^* \in [n]$  such that

$$g_{i^*} \geq \max_{i \in [n]} g_i - \sqrt{2}\Delta \quad (3)$$

- 4 **for**  $i = 1$  to  $i = n$  (except  $i = i^*$ ) **do**

- 5     Initialize  $\alpha_i \leftarrow 1/2$

- 6     Apply binary search to  $\alpha_i$  in  $\lceil \log_2(\gamma/\Delta) + 1 \rceil$  iterations by calling Algorithm 1 with input  $(\mathbf{x}, \frac{1}{\sqrt{1+\alpha_i^2}}(\alpha_i \mathbf{e}_{i^*} - \mathbf{e}_i), \Delta)$ . For the first iteration with  $\alpha_i = 1/2$ , if  $\alpha_i g_{i^*} - g_i \geq -\sqrt{2}\Delta$  we then take  $\alpha_i = 3/4$ ; if  $\alpha_i g_{i^*} - g_i \leq \sqrt{2}\Delta$  we then take  $\alpha_i = 1/4$ . Later iterations are similar. Upon finishing the binary search,  $\alpha_i$  satisfies

$$g_i - \sqrt{2}\Delta \leq \alpha_i g_{i^*} \leq g_i + \sqrt{2}\Delta \quad (4)$$

- 7 **return**  $\tilde{\mathbf{g}}(\mathbf{x}) = \frac{\alpha}{\|\alpha\|}$  where  $\alpha = (\alpha_1, \dots, \alpha_n)^\top$ ,  $\alpha_i$  ( $i \neq i^*$ ) is the output of the for loop,  $\alpha_{i^*} = 1$

### 3 CONVEX OPTIMIZATION BY COMPARISONS

In this section, we study convex optimization with function value comparisons:

**Problem 1** (Comparison-based convex optimization). *In the comparison-based convex optimization (CCO) problem we are given query access to a comparison oracle  $O_f^{\text{Comp}}$  (1) for an  $L$ -smooth convex function  $f: \mathbb{R}^n \rightarrow \mathbb{R}$  whose minimum is achieved at  $\mathbf{x}^*$  with  $\|\mathbf{x}^*\| \leq R$ . The goal is to output a point  $\tilde{\mathbf{x}}$  such that  $\|\tilde{\mathbf{x}}\| \leq R$  and  $f(\tilde{\mathbf{x}}) - f(\mathbf{x}^*) \leq \epsilon$ , i.e.,  $\tilde{\mathbf{x}}$  is an  $\epsilon$ -optimal point.*

We provide two algorithms that solve Problem 1. In Section 3.1, we use normalized gradient descent to achieve linear dependence in  $n$  (up to a log factor) in terms of comparison queries. In Section 3.2, we use cutting plane method to achieve  $\log(1/\epsilon)$  dependence in terms of comparison queries.

#### 3.1 COMPARISON-BASED ADAPTIVE NORMALIZED GRADIENT DESCENT

In this subsection, we present our first algorithm for Problem 1, Algorithm 3, which applies Comparison-GDE (Algorithm 2) with estimated gradient direction at each iteration to the adaptive normalized gradient descent (AdaNGD), originally introduced by Levy (2017).

**Theorem 2.** *Algorithm 3 solves Problem 1 using  $O(nLR^2/\epsilon \log(nLR^2/\epsilon))$  queries.*

The following result bounds the rate at which Algorithm 3 decreases the function value of  $f$ .

**Lemma 2.** *In the setting of Problem 1, Algorithm 3 satisfies*

$$\min_{t \in [T]} f(\mathbf{x}_t) - f^* \leq 2L(2R\sqrt{2T} + 2T\delta R)^2/T^2,$$

**Algorithm 3:** Comparison-based Approximate Adaptive Normalized Gradient Descent (Comparison-AdaNGD)**Input:** Function  $f: \mathbb{R}^n \rightarrow \mathbb{R}$ , precision  $\epsilon$ , radius  $R$ 

```

1  $T \leftarrow \frac{64LR^2}{\epsilon}, \delta \leftarrow \frac{1}{4R}\sqrt{\frac{\epsilon}{2L}}, \gamma \leftarrow \frac{\epsilon}{2R}, \mathbf{x}_0 \leftarrow \mathbf{0}$ 
2 for  $t = 0, \dots, T - 1$  do
3    $\hat{\mathbf{g}}_t \leftarrow \text{Comparison-GDE}(\mathbf{x}_t, \delta, \gamma)$ 
4    $\eta_t \leftarrow R\sqrt{2/t}$ 
5    $\mathbf{x}_{t+1} = \Pi_{\mathbb{B}_R(\mathbf{0})}(\mathbf{x}_t - \eta_t \hat{\mathbf{g}}_t)$ 
6  $t_{\text{out}} \leftarrow \operatorname{argmin}_{t \in [T]} f(\mathbf{x}_t)$ 
7 return  $\mathbf{x}_{t_{\text{out}}}$ 

```

if at each step we have

$$\left\| \tilde{\mathbf{g}}_t - \frac{\nabla f_t(\mathbf{x}_t)}{\|\nabla f_t(\mathbf{x}_t)\|} \right\| \leq \delta \leq 1.$$

The proof of Lemma 2 is deferred to Appendix B. We now prove Theorem 2 using Lemma 2.

*Proof of Theorem 2.* We show that Algorithm 3 solves Problem 1 by contradiction. Assume that the output of Algorithm 3 is not an  $\epsilon$ -optimal point of  $f$ , or equivalently,  $f(\mathbf{x}_t) - f^* \geq \epsilon$  for any  $t \in [T]$ . This leads to

$$\|\nabla f(\mathbf{x}_t)\| \geq \frac{f(\mathbf{x}_t) - f^*}{\|\mathbf{x}_t - \mathbf{x}^*\|} \geq \frac{\epsilon}{2R}, \quad \forall t \in [T]$$

given that  $f$  is convex. Hence, Theorem 1 promises that

$$\left\| \hat{\mathbf{g}}_t - \frac{\nabla f(\mathbf{x}_t)}{\|\nabla f(\mathbf{x}_t)\|} \right\| \leq \delta \leq 1.$$

With these approximate gradient directions, by Lemma 2 we can derive that

$$\min_{t \in [T]} f(\mathbf{x}_t) - f^* \leq 2L(2R\sqrt{2T} + 2T\delta R)^2/T^2 \leq \epsilon,$$

contradiction. This proves the correctness of Algorithm 3. The query complexity of Algorithm 3 only comes from the gradient direction estimation step in Line 3, which equals

$$T \cdot O(n \log(n/\delta)) = O\left(\frac{nLR^2}{\epsilon} \log\left(\frac{nLR^2}{\epsilon}\right)\right).$$

□

### 3.2 COMPARISON-BASED CUTTING PLANE METHOD

In this subsection, we provide a comparison-based cutting plane method that solves Problem 1. We begin by introducing the basic notation and concepts of cutting plane methods, which are algorithms that solves the feasibility problem defined as follows.

**Problem 2** (Feasibility Problem, Jiang et al. (2020); Sidford & Zhang (2023)). *We are given query access to a separation oracle for a set  $K \subset \mathbb{R}^n$  such that on query  $\mathbf{x} \in \mathbb{R}^n$  the oracle outputs a vector  $\mathbf{c}$  and either  $\mathbf{c} = \mathbf{0}$ , in which case  $\mathbf{x} \in K$ , or  $\mathbf{c} \neq \mathbf{0}$ , in which case  $H := \{\mathbf{z}: \mathbf{c}^\top \mathbf{z} \leq \mathbf{c}^\top \mathbf{x}\} \supset K$ . The goal is to query a point  $\mathbf{x} \in K$ .*

Jiang et al. (2020) developed a cutting plane method that solves Problem 2 using  $O(n \log(nR/r))$  queries to a separation oracle where  $R$  and  $r$  are parameters related to the convex set  $K$ .

**Lemma 3** (Theorem 1.1, Jiang et al. (2020)). *There is a cutting plane method which solves Problem 2 using at most  $C \cdot n \log(nR/r)$  queries for some constant  $C$ , given that the set  $K$  is contained in the ball of radius  $R$  centered at the origin and it contains a ball of radius  $r$ .*

Nemirovski (1994); Lee et al. (2015) showed that, running cutting plane method on a Lipschitz convex function  $f$  with the separation oracle being the gradient of  $f$  would yield a sequence of points where at least one of them is  $\epsilon$ -optimal. Furthermore, Sidford & Zhang (2023) showed that even if we cannot access the exact gradient value of  $f$ , it suffices to use an approximate gradient estimate with absolute error at most  $O(\epsilon/R)$ .

In this work, we show that this result can be extended to the case where we have an estimate of the gradient direction instead of the gradient itself. Specifically, we prove the following result.

**Theorem 3.** *There exists an algorithm based on cutting plane method that solves Problem 1 using  $O(n^2 \log(nLR^2/\epsilon))$  queries.*

Note that Theorem 3 improves the prior state-of-the-art from  $\tilde{O}(n^4)$  by Karabag et al. (2021) to  $\tilde{O}(n^2)$ .

*Proof of Theorem 3.* The proof follows a similar intuition as the proof of Proposition 1 in Sidford & Zhang (2023). Define  $\mathcal{K}_{\epsilon/2}$  to be the set of  $\epsilon/2$ -optimal points of  $f$ , and  $\mathcal{K}_\epsilon$  to be the set of  $\epsilon$ -optimal points of  $f$ . Given that  $f$  is  $L$ -smooth,  $\mathcal{K}_{\epsilon/2}$  must contain a ball of radius at least  $r_{\mathcal{K}} = \sqrt{\epsilon/L}$  since for any  $\mathbf{x}$  with  $\|\mathbf{x} - \mathbf{x}^*\| \leq r_{\mathcal{K}}$  we have

$$f(\mathbf{x}) - f(\mathbf{x}^*) \leq L\|\mathbf{x} - \mathbf{x}^*\|^2/2 \leq \epsilon/2.$$

We apply the cutting plane method, as described in Lemma 3, to query a point in  $\mathcal{K}_{\epsilon/2}$ , which is a subset of the ball  $\mathbb{B}_{2R}(\mathbf{0})$ . To achieve this, at each query  $\mathbf{x}$  of the cutting plane method, we use  $\text{Comparison-GDE}(\mathbf{x}, \delta, \gamma)$ , our comparison-based gradient direction estimation algorithm (Algorithm 2), as the separation oracle for the cutting plane method, where we set

$$\delta = \frac{1}{16R} \sqrt{\frac{\epsilon}{L}}, \quad \gamma = \sqrt{2L\epsilon}.$$

We show that any query outside of  $\mathcal{K}_\epsilon$  to  $\text{Comparison-GDE}(\mathbf{x}, \delta, \gamma)$  will be a valid separation oracle for  $\mathcal{K}_{\epsilon/2}$ . In particular, if we ever queried  $\text{Comparison-GDE}(\mathbf{x}, \delta, \gamma)$  at any  $\mathbf{x} \in \mathbb{B}_{2R}(\mathbf{0}) \setminus \mathcal{K}_\epsilon$  with output being  $\hat{\mathbf{g}}$ , for any  $\mathbf{y} \in \mathcal{K}_{\epsilon/2}$  we have

$$\begin{aligned} \langle \hat{\mathbf{g}}, \mathbf{y} - \mathbf{x} \rangle &\leq \left\langle \frac{\nabla f(\mathbf{x})}{\|\nabla f(\mathbf{x})\|}, \mathbf{y} - \mathbf{x} \right\rangle + \left\| \hat{\mathbf{g}} - \frac{\nabla f(\mathbf{x})}{\|\nabla f(\mathbf{x})\|} \right\| \cdot \|\mathbf{y} - \mathbf{x}\| \\ &\leq \frac{f(\mathbf{y}) - f(\mathbf{x})}{\|\nabla f(\mathbf{x})\|} + \left\| \hat{\mathbf{g}} - \frac{\nabla f(\mathbf{x})}{\|\nabla f(\mathbf{x})\|} \right\| \cdot \|\mathbf{y} - \mathbf{x}\| \leq -\frac{\epsilon}{2} + \frac{\epsilon}{10R} \cdot 4R < 0, \end{aligned}$$

where

$$\|\nabla f(\mathbf{x})\| \geq (f(\mathbf{x}) - f^*)/\|\mathbf{x} - \mathbf{x}^*\| \geq (f(\mathbf{x}) - f^*)/(2R)$$

given that  $f$  is convex. Combined with Theorem 1, it guarantees that

$$\left\| \hat{\mathbf{g}} - \frac{\nabla f(\mathbf{x})}{\|\nabla f(\mathbf{x})\|} \right\| \leq \delta = \frac{1}{16R} \sqrt{\frac{\epsilon}{L}}.$$

Hence,

$$\langle \hat{\mathbf{g}}, \mathbf{y} - \mathbf{x} \rangle \leq \frac{f(\mathbf{y}) - f(\mathbf{x})}{\|\nabla f(\mathbf{x})\|} + \left\| \hat{\mathbf{g}} - \frac{\nabla f(\mathbf{x})}{\|\nabla f(\mathbf{x})\|} \right\| \cdot \|\mathbf{y} - \mathbf{x}\| \leq -\frac{1}{2} \sqrt{\frac{\epsilon}{2L}} + \frac{1}{16R} \sqrt{\frac{\epsilon}{L}} \cdot 4R < 0,$$

indicating that  $\hat{\mathbf{g}}$  is a valid separation oracle for the set  $\mathcal{K}_{\epsilon/2}$ . Consequently, by Lemma 3, after  $Cn \log(nR/r_{\mathcal{K}})$  iterations, at least one of the queries must lie within  $\mathcal{K}_\epsilon$ , and we can choose the query with minimum function value to output, which can be done by making  $Cn \log(nR/r_{\mathcal{K}})$  comparisons.

Note that in each iteration  $O(n \log(n/\delta))$  queries to  $O_f^{\text{Comp}}(1)$  are needed. Hence, the overall query complexity equals

$$Cn \log(nR/r_{\mathcal{K}}) \cdot O(n \log(n/\delta)) + Cn \log(nR/r_{\mathcal{K}}) = O(n^2 \log(nLR^2/\epsilon)).$$

□



**Algorithm 4:** Comparison-based Approximate Normalized Gradient Descent (Comparison-NGD)**Input:** Function  $f: \mathbb{R}^n \rightarrow \mathbb{R}$ ,  $\Delta$ , precision  $\epsilon$ 


---

```

1  $T \leftarrow \frac{18L\Delta}{\epsilon^2}, \mathbf{x}_0 \leftarrow \mathbf{0}$ 
2 for  $t = 0, \dots, T - 1$  do
3    $\hat{\mathbf{g}}_t \leftarrow \text{Comparison-GDE}(\mathbf{x}_t, 1/6, \epsilon/12)$ 
4    $\mathbf{x}_t = \mathbf{x}_{t-1} - \epsilon \hat{\mathbf{g}}_t / (3L)$ 
5 Uniformly randomly select  $\mathbf{x}_{\text{out}}$  from  $\{\mathbf{x}_0, \dots, \mathbf{x}_T\}$ 
6 return  $\mathbf{x}_{\text{out}}$ 

```

---

## 4 NONCONVEX OPTIMIZATION BY COMPARISONS

In this section, we study nonconvex optimization with function value comparisons. We first develop an algorithm that finds an  $\epsilon$ -FOSP of a smooth nonconvex function in Section 4.1. Then in Section 4.2, we further develop an algorithm that finds an  $\epsilon$ -SOSP of a nonconvex function that is smooth and Hessian-Lipschitz.

## 4.1 FIRST-ORDER STATIONARY POINT COMPUTATION BY COMPARISONS

In this subsection, we focus on the problem of finding an  $\epsilon$ -FOSP of a smooth nonconvex function by making function value comparisons.

**Problem 3** (Comparison-based first-order stationary point computation). *In the Comparison-based first-order stationary point computation (Comparison-FOSP) problem we are given query access to a comparison oracle  $O_f^{\text{Comp}}(1)$  for an  $L$ -smooth (possibly) nonconvex function  $f: \mathbb{R}^n \rightarrow \mathbb{R}$  satisfying  $f(\mathbf{0}) - \inf_{\mathbf{x}} f(\mathbf{x}) \leq \Delta$ . The goal is to output an  $\epsilon$ -FOSP of  $f$ .*

We develop a comparison-based normalized gradient descent algorithm that solves Problem 3.

**Theorem 4.** *With success probability at least  $2/3$ , Algorithm 4 solves Problem 3 using  $O(L\Delta n \log n / \epsilon^2)$  queries.*

The proof of Theorem 4 is deferred to Appendix C.1.

## 4.2 ESCAPING SADDLE POINTS OF NONCONVEX FUNCTIONS BY COMPARISONS

In this subsection, we focus on the problem of escaping from saddle points, i.e., finding an  $\epsilon$ -SOSP of a nonconvex function that is smooth and Hessian-Lipschitz, by making function value comparisons.

**Problem 4** (Comparison-based escaping from saddle point). *In the Comparison-based escaping from saddle point (Comparison-SOSP) problem we are given query access to a comparison oracle  $O_f^{\text{Comp}}(1)$  for a (possibly) nonconvex function  $f: \mathbb{R}^n \rightarrow \mathbb{R}$  satisfying  $f(\mathbf{0}) - \inf_{\mathbf{x}} f(\mathbf{x}) \leq \Delta$  that is  $L$ -smooth and  $\rho$ -Hessian Lipschitz. The goal is to output an  $\epsilon$ -SOSP of  $f$ .*

Our algorithm for Problem 4 given in Algorithm 5 is a combination of comparison-based normalized gradient descent and comparison-based negative curvature descent (Comparison-NCD). Specifically, Comparison-NCD is built upon our comparison-based negative curvature finding algorithms, Comparison-NCF1 (Algorithm 8) and Comparison-NCF2 (Algorithm 9) that work when the gradient is small or large respectively, and can decrease the function value efficiently when applied at a point with a large negative curvature.

**Lemma 4.** *In the setting of Problem 4, for any  $\mathbf{z}$  satisfying  $\lambda_{\min}(\nabla^2 f(\mathbf{x})) \leq -\sqrt{\rho\epsilon}$ , Algorithm 6 outputs a point  $\mathbf{z}_{\text{out}} \in \mathbb{R}^n$  satisfying*

$$f(\mathbf{z}_{\text{out}}) - f(\mathbf{z}) \leq -\frac{1}{48} \sqrt{\frac{\epsilon^3}{\rho}}$$

*with success probability at least  $1 - \zeta$  using  $O\left(\frac{L^2 n^{3/2}}{\zeta \rho \epsilon} \log^2 \frac{nL}{\zeta \sqrt{\rho \epsilon}}\right)$  queries.*

**Algorithm 5:** Comparison-based Perturbed Normalized Gradient Descent (Comparison-PNGD)**Input:** Function  $f: \mathbb{R}^n \rightarrow \mathbb{R}$ ,  $\Delta$ , precision  $\epsilon$ 


---

```

1  $\mathcal{S} \leftarrow 350\Delta\sqrt{\frac{p}{\epsilon^3}}, \delta \leftarrow \frac{1}{6}, \mathbf{x}_{1,0} \leftarrow \mathbf{0}$ 
2  $\mathcal{T} \leftarrow \frac{384L^2\sqrt{n}}{\delta\rho\epsilon} \log \frac{36nL}{\sqrt{\rho\epsilon}}, p \leftarrow \frac{100}{\mathcal{T}} \log \mathcal{S}$ 
3 for  $s = 1, \dots, \mathcal{S}$  do
4   for  $t = 0, \dots, \mathcal{T} - 1$  do
5      $\hat{\mathbf{g}}_t \leftarrow \text{Comparison-GDE}(\mathbf{x}_{s,t}, \delta, \gamma)$ 
6      $\mathbf{y}_{s,t} \leftarrow \mathbf{x}_{s,t} - \epsilon\hat{\mathbf{g}}_t/(3L)$ 
7     Choose  $\mathbf{x}_{s,t+1}$  to be the point between  $\{x_{s,t}, \mathbf{y}_{s,t}\}$  with smaller function value
8      $\mathbf{x}'_{s,t+1} \leftarrow \begin{cases} \mathbf{0}, & \text{w.p. } 1-p \\ \text{Comparison-NCD}(\mathbf{x}_{s,t+1}, \epsilon, \delta), & \text{w.p. } p \end{cases}$ 
9     Choose  $\mathbf{x}_{s+1,0}$  among  $\{\mathbf{x}_{s,0}, \dots, \mathbf{x}_{s,\mathcal{T}}, \mathbf{x}'_{s,0}, \dots, \mathbf{x}'_{s,\mathcal{T}}\}$  with the smallest function value.
10     $\mathbf{x}'_{s+1,0} \leftarrow \begin{cases} \mathbf{0}, & \text{w.p. } 1-p \\ \text{Comparison-NCD}(\mathbf{x}_{s+1,0}, \epsilon, \delta), & \text{w.p. } p \end{cases}$ 
11 Uniformly randomly select  $s_{\text{out}} \in \{1, \dots, \mathcal{S}\}$  and  $t_{\text{out}} \in [\mathcal{T}]$ 
12 return  $\mathbf{x}_{s_{\text{out}}, t_{\text{out}}}$ 

```

---

**Algorithm 6:** Comparison-based Negative Curvature Descent (Comparison-NCD)**Input:** Function  $f: \mathbb{R}^n \rightarrow \mathbb{R}$ , precision  $\epsilon$ , input point  $\mathbf{z}$ , error probability  $\delta$ 


---

```

1  $\mathbf{v}_1 \leftarrow \text{Comparison-NCF1}(\mathbf{z}, \epsilon, \delta)$ 
2  $\mathbf{v}_2 \leftarrow \text{Comparison-NCF2}(\mathbf{z}, \epsilon, \delta)$ 
3  $\mathbf{z}_{1,+} = \mathbf{z} + \frac{1}{2}\sqrt{\frac{\epsilon}{\rho}}\mathbf{v}_1, \mathbf{z}_{1,-} = \mathbf{z} - \frac{1}{2}\sqrt{\frac{\epsilon}{\rho}}\mathbf{v}_1, \mathbf{z}_{2,+} = \mathbf{z} + \frac{1}{2}\sqrt{\frac{\epsilon}{\rho}}\mathbf{v}_2, \mathbf{z}_{2,-} = \mathbf{z} - \frac{1}{2}\sqrt{\frac{\epsilon}{\rho}}\mathbf{v}_2$ 
4 return  $\mathbf{z}_{\text{out}} \in \{\mathbf{z}_{1,+}, \mathbf{z}_{1,-}, \mathbf{z}_{2,+}, \mathbf{z}_{2,-}\}$  with the smallest function value.

```

---

The proof of Lemma 4 is deferred to Appendix C.3. Next, we present the main result of this subsection, which describes the complexity of solving Problem 4 using Algorithm 5.

**Theorem 5.** *With success probability at least  $2/3$ , Algorithm 5 solves Problem 4 using an expected  $O\left(\frac{\Delta L^2 n^{3/2}}{\rho^{1/2} \epsilon^{5/2}} \log^3 \frac{nL}{\sqrt{\rho\epsilon}}\right)$  queries.*

The proof of Theorem 5 is deferred to Appendix C.4.

## REFERENCES

- Naman Agarwal, Zeyuan Allen-Zhu, Brian Bullins, Elad Hazan, and Tengyu Ma. Finding approximate local minima faster than gradient descent. In *Proceedings of the 49th Annual ACM SIGACT Symposium on Theory of Computing*, pp. 1195–1199, 2017. arXiv:1611.01146
- Zeyuan Allen-Zhu and Yuanzhi Li. Neon2: Finding local minima via first-order oracles. In *Advances in Neural Information Processing Systems*, pp. 3716–3726, 2018. arXiv:1711.06673
- Charles Audet and John E. Dennis Jr. Mesh adaptive direct search algorithms for constrained optimization. *SIAM Journal on Optimization*, 17(1):188–217, 2006.
- Krishnakumar Balasubramanian and Saeed Ghadimi. Zeroth-order nonconvex stochastic optimization: Handling constraints, high dimensionality, and saddle points. *Foundations of Computational Mathematics*, pp. 1–42, 2022. arXiv:1809.06474
- El Houcine Bergou, Eduard Gorbunov, and Peter Richtárik. Stochastic three points method for unconstrained smooth minimization. *SIAM Journal on Optimization*, 30(4):2726–2749, 2020. arXiv:1902.03591

- Jeremy Bernstein, Yu-Xiang Wang, Kamyar Azizzadenesheli, and Animashree Anandkumar. signSGD: Compressed optimisation for non-convex problems. In *International Conference on Machine Learning*, pp. 560–569. PMLR, 2018. arXiv:1802.04434
- HanQin Cai, Daniel McKenzie, Wotao Yin, and Zhenliang Zhang. A one-bit, comparison-based gradient estimator. *Applied and Computational Harmonic Analysis*, 60:242–266, 2022. arXiv:2010.02479
- Yair Carmon, John C. Duchi, Oliver Hinder, and Aaron Sidford. Accelerated methods for nonconvex optimization. *SIAM Journal on Optimization*, 28(2):1751–1772, 2018. arXiv:1611.00756
- Pin-Yu Chen, Huan Zhang, Yash Sharma, Jinfeng Yi, and Cho-Jui Hsieh. Zoo: Zeroth order optimization based black-box attacks to deep neural networks without training substitute models. In *Proceedings of the 10th ACM Workshop on Artificial Intelligence and Security*, pp. 15–26, 2017. arXiv:1708.03999
- Xiaoyu Chen, Han Zhong, Zhuoran Yang, Zhaoran Wang, and Liwei Wang. Human-in-the-loop: Provably efficient preference-based reinforcement learning with general function approximation. In *International Conference on Machine Learning*, pp. 3773–3793. PMLR, 2022. arXiv:2205.11140
- Krzysztof Choromanski, Mark Rowland, Vikas Sindhwani, Richard Turner, and Adrian Weller. Structured evolution with compact architectures for scalable policy optimization. In *International Conference on Machine Learning*, pp. 970–978. PMLR, 2018. arXiv:1804.02395
- Frank E. Curtis, Daniel P. Robinson, and Mohammadreza Samadi. A trust region algorithm with a worst-case iteration complexity of  $\mathcal{O}(\epsilon^{-3/2})$  for nonconvex optimization. *Mathematical Programming*, 162(1-2):1–32, 2017.
- John E. Dennis, Jr and Virginia Torczon. Direct search methods on parallel machines. *SIAM Journal on Optimization*, 1(4):448–474, 1991.
- John Duchi, Elad Hazan, and Yoram Singer. Adaptive subgradient methods for online learning and stochastic optimization. *Journal of Machine Learning Research*, 12(7):2121–2159, 2011.
- John C Duchi, Michael I Jordan, Martin J Wainwright, and Andre Wibisono. Optimal rates for zero-order convex optimization: The power of two function evaluations. *IEEE Transactions on Information Theory*, 61(5):2788–2806, 2015. arXiv:1312.2139
- Cong Fang, Chris Junchi Li, Zhouchen Lin, and Tong Zhang. SPIDER: Near-optimal non-convex optimization via stochastic path-integrated differential estimator. *Advances in Neural Information Processing Systems*, 31, 2018. arXiv:1807.01695
- Saeed Ghadimi and Guanghui Lan. Stochastic first-and zeroth-order methods for nonconvex stochastic programming. *SIAM Journal on Optimization*, 23(4):2341–2368, 2013. arXiv:1309.5549
- Amir Gholami, Sehoon Kim, Zhen Dong, Zhewei Yao, Michael W. Mahoney, and Kurt Keutzer. A survey of quantization methods for efficient neural network inference. In *Low-Power Computer Vision*, pp. 291–326. Chapman and Hall/CRC, 2022. arXiv:2103.13630
- Eduard Gorbunov, Adel Bibi, Ozan Sener, El Houcine Bergou, and Peter Richtarik. A stochastic derivative free optimization method with momentum. In *International Conference on Learning Representations*, 2020. arXiv:1905.13278
- Kevin G. Jamieson, Robert Nowak, and Ben Recht. Query complexity of derivative-free optimization. *Advances in Neural Information Processing Systems*, 25, 2012. arXiv:1209.2434
- Kaiyi Ji, Zhe Wang, Yi Zhou, and Yingbin Liang. Improved zeroth-order variance reduced algorithms and analysis for nonconvex optimization. In *International Conference on Machine Learning*, pp. 3100–3109. PMLR, 2019. arXiv:1910.12166

- Haotian Jiang, Yin Tat Lee, Zhao Song, and Sam Chiu-wai Wong. An improved cutting plane method for convex optimization, convex-concave games, and its applications. In *Proceedings of the 52nd Annual ACM SIGACT Symposium on Theory of Computing*, pp. 944–953, 2020. arXiv:2004.04250
- Chi Jin, Lydia T. Liu, Rong Ge, and Michael I. Jordan. On the local minima of the empirical risk. *Advances in Neural Information Processing Systems*, 31, 2018a. arXiv:1803.09357
- Chi Jin, Praneeth Netrapalli, and Michael I. Jordan. Accelerated gradient descent escapes saddle points faster than gradient descent. In *Conference on Learning Theory*, pp. 1042–1085, 2018b. arXiv:1711.10456
- Mustafa O. Karabag, Cyrus Neary, and Ufuk Topcu. Smooth convex optimization using sub-zeroth-order oracles. *Proceedings of the AAAI Conference on Artificial Intelligence*, 35(5):3815–3822, 2021. arXiv:2103.00667
- Diederik P. Kingma and Jimmy Ba. Adam: A method for stochastic optimization. In *International Conference on Learning Representations*, 2015. arXiv:1412.6980
- Tamara G. Kolda, Robert Michael Lewis, and Virginia Torczon. Optimization by direct search: New perspectives on some classical and modern methods. *SIAM review*, 45(3):385–482, 2003.
- Jeffrey Larson, Matt Menickelly, and Stefan M. Wild. Derivative-free optimization methods. *Acta Numerica*, 28:287–404, 2019. arXiv:904.11585
- Yin Tat Lee, Aaron Sidford, and Sam Chiu-wai Wong. A faster cutting plane method and its implications for combinatorial and convex optimization. In *2015 IEEE 56th Annual Symposium on Foundations of Computer Science*, pp. 1049–1065. IEEE, 2015. arXiv:1508.04874
- Yin Tat Lee, Aaron Sidford, and Santosh S. Vempala. Efficient convex optimization with membership oracles. In *Proceedings of the 31st Conference on Learning Theory*, volume 75 of *Proceedings of Machine Learning Research*, pp. 1292–1294, 2018. arXiv:1706.07357
- Kfir Levy. Online to offline conversions, universality and adaptive minibatch sizes. *Advances in Neural Information Processing Systems*, 30, 2017. arXiv:1705.10499
- Xiuxian Li, Kuo-Yi Lin, Li Li, Yiguang Hong, and Jie Chen. On faster convergence of scaled sign gradient descent. *IEEE Transactions on Industrial Informatics*, 2023. arXiv:2109.01806
- Sijia Liu, Pin-Yu Chen, Xiangyi Chen, and Mingyi Hong. signSGD via zeroth-order oracle. In *International Conference on Learning Representations*, 2019.
- Aleksander Madry, Aleksandar Makelov, Ludwig Schmidt, Dimitris Tsipras, and Adrian Vladu. Towards deep learning models resistant to adversarial attacks. In *International Conference on Learning Representations*, 2018. arXiv:1706.06083
- John A. Nelder and Roger Mead. A simplex method for function minimization. *The Computer Journal*, 7(4):308–313, 1965.
- Arkadi Nemirovski. Efficient methods in convex programming. *Lecture notes*, 1994.
- Yurii Nesterov and Boris T. Polyak. Cubic regularization of Newton method and its global performance. *Mathematical Programming*, 108(1):177–205, 2006.
- Yurii Nesterov and Vladimir Spokoiny. Random gradient-free minimization of convex functions. *Foundations of Computational Mathematics*, 17:527–566, 2017.
- Ellen Novoseller, Yibing Wei, Yanan Sui, Yisong Yue, and Joel Burdick. Dueling posterior sampling for preference-based reinforcement learning. In *Conference on Uncertainty in Artificial Intelligence*, pp. 1029–1038. PMLR, 2020. arXiv:1908.01289

- Long Ouyang, Jeffrey Wu, Xu Jiang, Diogo Almeida, Carroll Wainwright, Pamela Mishkin, Chong Zhang, Sandhini Agarwal, Katarina Slama, Alex Ray, et al. Training language models to follow instructions with human feedback. *Advances in Neural Information Processing Systems*, 35: 27730–27744, 2022. arXiv:2203.02155
- Nicolas Papernot, Patrick McDaniel, Ian Goodfellow, Somesh Jha, Z Berkay Celik, and Ananthram Swami. Practical black-box attacks against machine learning. In *Proceedings of the 2017 ACM on Asia Conference on Computer and Communications Security*, pp. 506–519, 2017. arXiv:1602.02697
- Aadirupa Saha, Tomer Koren, and Yishay Mansour. Dueling convex optimization. In *International Conference on Machine Learning*, pp. 9245–9254. PMLR, 2021.
- Aadirupa Saha, Tomer Koren, and Yishay Mansour. Dueling convex optimization with general preferences, 2022. arXiv:2210.02562
- Aadirupa Saha, Aldo Pacchiano, and Jonathan Lee. Dueling RL: Reinforcement learning with trajectory preferences. In *International Conference on Artificial Intelligence and Statistics*, pp. 6263–6289. PMLR, 2023. arXiv:2111.04850
- Tim Salimans, Jonathan Ho, Xi Chen, Szymon Sidor, and Ilya Sutskever. Evolution strategies as a scalable alternative to reinforcement learning, 2017. arXiv:1703.03864
- Aaron Sidford and Chenyi Zhang. Quantum speedups for stochastic optimization. *Advances in Neural Information Processing Systems*, 37, 2023. arXiv:2308.01582
- Zhiwei Tang, Dmitry Rybin, and Tsung-Hui Chang. Zeroth-order optimization meets human feedback: Provable learning via ranking oracles, 2023. arXiv:2303.03751
- Emmanouil-Vasileios Vlastakis-Gkaragkounis, Lampros Flokas, and Georgios Piliouras. Efficiently avoiding saddle points with zero order methods: No gradients required. *Advances in Neural Information Processing Systems*, 32, 2019. arXiv:1910.13021
- Yuanhao Wang, Qinghua Liu, and Chi Jin. Is RLHF more difficult than standard RL? a theoretical perspective. In *Thirty-seventh Conference on Neural Information Processing Systems*, 2023. arXiv:2306.14111
- Yi Xu, Rong Jin, and Tianbao Yang. First-order stochastic algorithms for escaping from saddle points in almost linear time. In *Advances in Neural Information Processing Systems*, pp. 5530–5540, 2018. arXiv:1711.01944
- Yichong Xu, Ruosong Wang, Lin Yang, Aarti Singh, and Artur Dubrawski. Preference-based reinforcement learning with finite-time guarantees. *Advances in Neural Information Processing Systems*, 33:18784–18794, 2020. arXiv:2006.08910
- Chenyi Zhang and Tongyang Li. Escape saddle points by a simple gradient-descent based algorithm. *Advances in Neural Information Processing Systems*, 34:8545–8556, 2021. arXiv:2111.14069
- Hualin Zhang and Bin Gu. Faster gradient-free methods for escaping saddle points. In *The Eleventh International Conference on Learning Representations*, 2023.
- Hualin Zhang, Huan Xiong, and Bin Gu. Zeroth-order negative curvature finding: Escaping saddle points without gradients. *Advances in Neural Information Processing Systems*, 35:38332–38344, 2022. arXiv:2210.01496
- Banghua Zhu, Jiantao Jiao, and Michael Jordan. Principled reinforcement learning with human feedback from pairwise or  $k$ -wise comparisons. In *ICLR 2023 Workshop on Mathematical and Empirical Understanding of Foundation Models*, 2023. arXiv:2301.11270

## A AUXILIARY LEMMAS

### A.1 DISTANCE BETWEEN NORMALIZED VECTORS

**Lemma 5.** *If  $\mathbf{v}, \mathbf{v}' \in \mathbb{R}^n$  are two vectors such that  $\|\mathbf{v}\| \geq \gamma$  and  $\|\mathbf{v} - \mathbf{v}'\| \leq \tau$ , we have*

$$\left\| \frac{\mathbf{v}}{\|\mathbf{v}\|} - \frac{\mathbf{v}'}{\|\mathbf{v}'\|} \right\| \leq \frac{2\tau}{\gamma}.$$

*Proof.* By the triangle inequality, we have

$$\begin{aligned} \left\| \frac{\mathbf{v}}{\|\mathbf{v}\|} - \frac{\mathbf{v}'}{\|\mathbf{v}'\|} \right\| &\leq \left\| \frac{\mathbf{v}}{\|\mathbf{v}\|} - \frac{\mathbf{v}'}{\|\mathbf{v}\|} \right\| + \left\| \frac{\mathbf{v}'}{\|\mathbf{v}\|} - \frac{\mathbf{v}'}{\|\mathbf{v}'\|} \right\| \\ &= \frac{\|\mathbf{v} - \mathbf{v}'\|}{\|\mathbf{v}\|} + \frac{\|\mathbf{v}\| - \|\mathbf{v}'\|}{\|\mathbf{v}\|} \frac{\|\mathbf{v}'\|}{\|\mathbf{v}'\|} \\ &\leq \frac{\tau}{\gamma} + \frac{\tau}{\gamma} = \frac{2\tau}{\gamma}. \end{aligned}$$

□

**Lemma 6.** *If  $\mathbf{v}_1, \mathbf{v}_2 \in \mathbb{R}^n$  are two vectors such that  $\|\mathbf{v}_1\|, \|\mathbf{v}_2\| \geq \gamma$ , and  $\mathbf{v}'_1, \mathbf{v}'_2 \in \mathbb{R}^n$  are another two vectors such that  $\|\mathbf{v}_1 - \mathbf{v}'_1\|, \|\mathbf{v}_2 - \mathbf{v}'_2\| \leq \tau$  where  $0 < \tau < \gamma$ , we have*

$$\left| \left\langle \frac{\mathbf{v}_1}{\|\mathbf{v}_1\|}, \frac{\mathbf{v}_2}{\|\mathbf{v}_2\|} \right\rangle - \left\langle \frac{\mathbf{v}'_1}{\|\mathbf{v}'_1\|}, \frac{\mathbf{v}'_2}{\|\mathbf{v}'_2\|} \right\rangle \right| \leq \frac{6\tau}{\gamma}.$$

*Proof.* By the triangle inequality, we have

$$\begin{aligned} &\left| \left\langle \frac{\mathbf{v}_1}{\|\mathbf{v}_1\|}, \frac{\mathbf{v}_2}{\|\mathbf{v}_2\|} \right\rangle - \left\langle \frac{\mathbf{v}'_1}{\|\mathbf{v}'_1\|}, \frac{\mathbf{v}'_2}{\|\mathbf{v}'_2\|} \right\rangle \right| \\ &\leq \left| \left\langle \frac{\mathbf{v}_1}{\|\mathbf{v}_1\|}, \frac{\mathbf{v}_2}{\|\mathbf{v}_2\|} \right\rangle - \left\langle \frac{\mathbf{v}'_1}{\|\mathbf{v}_1\|}, \frac{\mathbf{v}'_2}{\|\mathbf{v}_2\|} \right\rangle \right| + \left| \left\langle \frac{\mathbf{v}'_1}{\|\mathbf{v}_1\|}, \frac{\mathbf{v}'_2}{\|\mathbf{v}_2\|} \right\rangle - \left\langle \frac{\mathbf{v}'_1}{\|\mathbf{v}'_1\|}, \frac{\mathbf{v}'_2}{\|\mathbf{v}'_2\|} \right\rangle \right|. \end{aligned}$$

On the one hand, by the triangle inequality and the Cauchy-Schwarz inequality,

$$\begin{aligned} \left| \left\langle \frac{\mathbf{v}_1}{\|\mathbf{v}_1\|}, \frac{\mathbf{v}_2}{\|\mathbf{v}_2\|} \right\rangle - \left\langle \frac{\mathbf{v}'_1}{\|\mathbf{v}_1\|}, \frac{\mathbf{v}'_2}{\|\mathbf{v}_2\|} \right\rangle \right| &\leq \frac{1}{\|\mathbf{v}_1\| \|\mathbf{v}_2\|} (|\langle \mathbf{v}_1, \mathbf{v}_2 \rangle - \langle \mathbf{v}_1, \mathbf{v}'_2 \rangle| + |\langle \mathbf{v}_1, \mathbf{v}'_2 \rangle - \langle \mathbf{v}'_1, \mathbf{v}'_2 \rangle|) \\ &\leq \frac{\|\mathbf{v}_2 - \mathbf{v}'_2\|}{\|\mathbf{v}_2\|} + \frac{\|\mathbf{v}_1 - \mathbf{v}'_1\| \|\mathbf{v}'_2\|}{\|\mathbf{v}_1\| \|\mathbf{v}_2\|} \\ &\leq \frac{\tau}{\gamma} + \frac{\tau(\gamma + \tau)}{\gamma^2}. \end{aligned}$$

On the other hand, by the Cauchy-Schwarz inequality,  $|\langle \mathbf{v}'_1, \mathbf{v}'_2 \rangle| \leq \|\mathbf{v}'_1\| \|\mathbf{v}'_2\|$ , and hence

$$\begin{aligned} \left| \left\langle \frac{\mathbf{v}'_1}{\|\mathbf{v}_1\|}, \frac{\mathbf{v}'_2}{\|\mathbf{v}_2\|} \right\rangle - \left\langle \frac{\mathbf{v}'_1}{\|\mathbf{v}'_1\|}, \frac{\mathbf{v}'_2}{\|\mathbf{v}'_2\|} \right\rangle \right| &= |\langle \mathbf{v}'_1, \mathbf{v}'_2 \rangle| \left| \frac{1}{\|\mathbf{v}_1\| \|\mathbf{v}_2\|} - \frac{1}{\|\mathbf{v}'_1\| \|\mathbf{v}'_2\|} \right| \\ &\leq \left| \frac{\|\mathbf{v}'_1\| \|\mathbf{v}'_2\|}{\|\mathbf{v}_1\| \|\mathbf{v}_2\|} - 1 \right| \\ &\leq \left( \frac{\gamma + \tau}{\gamma} \right)^2 - 1. \end{aligned}$$

In all, due to  $\tau < \gamma$ ,

$$\left| \left\langle \frac{\mathbf{v}_1}{\|\mathbf{v}_1\|}, \frac{\mathbf{v}_2}{\|\mathbf{v}_2\|} \right\rangle - \left\langle \frac{\mathbf{v}'_1}{\|\mathbf{v}'_1\|}, \frac{\mathbf{v}'_2}{\|\mathbf{v}'_2\|} \right\rangle \right| \leq \frac{\tau}{\gamma} + \frac{\tau(\gamma + \tau)}{\gamma^2} + \left( \frac{\gamma + \tau}{\gamma} \right)^2 - 1 = \frac{2\tau(2\gamma + \tau)}{\gamma^2} \leq \frac{6\tau}{\gamma}.$$

□

## A.2 A FACT FOR VECTOR NORMS

**Lemma 7.** For any nonzero vectors  $\mathbf{v}, \mathbf{g} \in \mathbb{R}^n$ ,

$$\sqrt{\frac{1 - \langle \frac{\mathbf{v}+\mathbf{g}}{\|\mathbf{v}+\mathbf{g}\|}, \frac{\mathbf{v}}{\|\mathbf{v}\|} \rangle^2}{1 - \langle \frac{\mathbf{v}-\mathbf{g}}{\|\mathbf{v}-\mathbf{g}\|}, \frac{\mathbf{v}}{\|\mathbf{v}\|} \rangle^2}} = \frac{\|\mathbf{v} - \mathbf{g}\|}{\|\mathbf{v} + \mathbf{g}\|}.$$

*Proof.* We have

$$\begin{aligned} \frac{1 - \langle \frac{\mathbf{v}+\mathbf{g}}{\|\mathbf{v}+\mathbf{g}\|}, \frac{\mathbf{v}}{\|\mathbf{v}\|} \rangle^2}{1 - \langle \frac{\mathbf{v}-\mathbf{g}}{\|\mathbf{v}-\mathbf{g}\|}, \frac{\mathbf{v}}{\|\mathbf{v}\|} \rangle^2} \cdot \frac{\|\mathbf{v} + \mathbf{g}\|^2}{\|\mathbf{v} - \mathbf{g}\|^2} &= \frac{\|\mathbf{v} + \mathbf{g}\|^2 - \langle \mathbf{v} + \mathbf{g}, \frac{\mathbf{v}}{\|\mathbf{v}\|} \rangle^2}{\|\mathbf{v} - \mathbf{g}\|^2 - \langle \mathbf{v} - \mathbf{g}, \frac{\mathbf{v}}{\|\mathbf{v}\|} \rangle^2} \\ &= \frac{\langle \mathbf{v} + \mathbf{g}, \mathbf{v} + \mathbf{g} \rangle - (\|\mathbf{v}\| + \frac{\langle \mathbf{v}, \mathbf{g} \rangle}{\|\mathbf{v}\|})^2}{\langle \mathbf{v} - \mathbf{g}, \mathbf{v} - \mathbf{g} \rangle - (\|\mathbf{v}\| - \frac{\langle \mathbf{v}, \mathbf{g} \rangle}{\|\mathbf{v}\|})^2} \\ &= \frac{\|\mathbf{v}\|^2 + \|\mathbf{g}\|^2 + 2\langle \mathbf{v}, \mathbf{g} \rangle - (\|\mathbf{v}\|^2 + 2\langle \mathbf{v}, \mathbf{g} \rangle + \frac{\langle \mathbf{v}, \mathbf{g} \rangle^2}{\|\mathbf{v}\|^2})}{\|\mathbf{v}\|^2 + \|\mathbf{g}\|^2 - 2\langle \mathbf{v}, \mathbf{g} \rangle - (\|\mathbf{v}\|^2 - 2\langle \mathbf{v}, \mathbf{g} \rangle + \frac{\langle \mathbf{v}, \mathbf{g} \rangle^2}{\|\mathbf{v}\|^2})} \\ &= 1. \end{aligned}$$

□

## A.3 GRADIENT UPPER BOUND OF SMOOTH CONVEX FUNCTIONS

**Lemma 8** (Lemma A.2, Levy (2017)). For any  $L$ -smooth convex function  $f: \mathbb{R}^n \rightarrow \mathbb{R}$  and any  $\mathbf{x} \in \mathbb{R}^n$ , we have

$$\|\nabla f(\mathbf{x})\|^2 \leq 2L(f(\mathbf{x}) - f^*).$$

## B APPROXIMATE ADAPTIVE NORMALIZED GRADIENT DESCENT (APPROX-ADANGD)

In this section, we prove technical details of the normalized gradient descent we use for convex optimization. Inspired by Levy (2017) which conducted a detailed analysis for the normalized gradient descent method, we first introduce the Approximate Adaptive Gradient Descent (Approx-AdaGrad) algorithm below:

---

**Algorithm 7:** Approximate Adaptive Gradient Descent (Approx-AdaGrad)

---

**Input:** # Iterations  $T$ , a set of convex functions  $\{f_t\}_{t=1}^T$ ,  $\mathbf{x}_0 \in \mathbb{R}^n$ , a convex set  $\mathcal{K}$  with diameter  $D$

```

1 for  $t = 1, \dots, T$  do
2   Calculate an estimate  $\tilde{\mathbf{g}}_t$  of  $\nabla f_t(\mathbf{x}_{t-1})$ 
3    $\eta_t \leftarrow D/\sqrt{2t}$ 
4    $\mathbf{x}_t = \Pi_{\mathcal{K}}(\mathbf{x}_{t-1} - \eta_t \tilde{\mathbf{g}}_t)$ 

```

---

**Lemma 9.** Algorithm 7 guarantees the following regret

$$\sum_{t=1}^T f_t(\mathbf{x}_t) - \min_{\mathbf{x} \in \mathcal{K}} \sum_{t=1}^T f_t(\mathbf{x}) \leq D\sqrt{2T} + T\delta D.$$

if at each step  $t$  we have

$$\|\nabla f_t(\mathbf{x}_t)\| = 1, \quad \|\tilde{\mathbf{g}}_t - \nabla f_t(\mathbf{x}_t)\| \leq \delta, \quad \|\tilde{\mathbf{g}}_t\| = 1.$$

*Proof.* The proof follows the flow of the proof of Theorem 1.1 in Levy (2017). For any  $t \in [T]$  and  $\mathbf{x} \in \mathcal{K}$  we have

$$\|\mathbf{x}_{t+1} - \mathbf{x}\|^2 \leq \|\mathbf{x}_t - \mathbf{x}\|^2 - 2\eta_t \langle \tilde{\mathbf{g}}_t, \mathbf{x}_t - \mathbf{x} \rangle + \eta_t^2 \|\tilde{\mathbf{g}}_t\|^2$$

and

$$\langle \tilde{\mathbf{g}}_t, \mathbf{x}_t - \mathbf{x} \rangle \leq \frac{1}{2\eta_t} (\|\mathbf{x}_t - \mathbf{x}\|^2 - \|\mathbf{x}_{t+1} - \mathbf{x}\|^2) + \frac{\eta_t}{2} \|\tilde{\mathbf{g}}_t\|^2.$$

Since  $f_t$  is convex for each  $t$ , we have

$$\begin{aligned} f_t(\mathbf{x}_t) - f_t(\mathbf{x}) &\leq \langle \nabla f_t(\mathbf{x}_t), \mathbf{x}_t - \mathbf{x} \rangle \\ &\leq \langle \tilde{\mathbf{g}}_t, \mathbf{x}_t - \mathbf{x} \rangle + \|\tilde{\mathbf{g}}_t - \nabla f_t(\mathbf{x}_t)\| \cdot \|\mathbf{x}_t - \mathbf{x}\| \\ &\leq \langle \tilde{\mathbf{g}}_t, \mathbf{x}_t - \mathbf{x} \rangle + \delta D, \end{aligned}$$

which leads to

$$\sum_{t=1}^T f_t(\mathbf{x}_t) - \sum_{t=1}^T f_t(\mathbf{x}) \leq \sum_{t=1}^T \frac{\|\mathbf{x}_t - \mathbf{x}\|^2}{2} \left( \frac{1}{\eta_t} - \frac{1}{\eta_{t-1}} \right) + \sum_{t=1}^T \frac{\eta_t}{2} \|\tilde{\mathbf{g}}_t\|^2 + T\delta D,$$

where we denote  $\eta_0 = \infty$ . Further we can derive that

$$\begin{aligned} \sum_{t=1}^T f_t(\mathbf{x}_t) - \sum_{t=1}^T f_t(\mathbf{x}) &\leq \frac{D^2}{2} \sum_{t=1}^T \left( \frac{1}{\eta_t} - \frac{1}{\eta_{t-1}} \right) + \frac{D}{2\sqrt{2}} \sum_{t=1}^T \frac{\|\tilde{\mathbf{g}}_t\|^2}{\sqrt{t}} + T\delta D \\ &\leq \frac{D^2}{2\eta_T} + \frac{D}{2\sqrt{2}} \sum_{t=1}^T \frac{1}{\sqrt{t}} + T\delta D, \end{aligned}$$

Moreover, we have

$$\sum_{t=1}^T \frac{1}{\sqrt{t}} \leq 2\sqrt{T},$$

which leads to

$$\begin{aligned} \sum_{t=1}^T f_t(\mathbf{x}_t) - \sum_{t=1}^T f_t(\mathbf{x}) &\leq \frac{D^2}{2\eta_T} + \frac{D}{2\sqrt{2}} \sum_{t=1}^T \frac{1}{\sqrt{t}} + T\delta D \\ &\leq D\sqrt{2T} + T\delta D. \end{aligned}$$

□

Now, we can prove Lemma 2 which guarantees the completeness of Theorem 2.

*Proof of Lemma 2.* The proof follows the flow of the proof of Theorem 2.1 in Levy (2017). In particular, observe that Algorithm 3 is equivalent to applying Approx-AdaGrad (Algorithm 7) to the following sequence of functions

$$\tilde{f}_t(\mathbf{x}) := \frac{\langle \nabla f(\mathbf{x}_t), \mathbf{x} \rangle}{\|\nabla f(\mathbf{x}_t)\|}, \quad \forall t \in [T].$$

Then by Lemma 9, for any  $\mathbf{x} \in \mathcal{K}$  we have

$$\sum_{t=1}^T \frac{\langle \nabla f(\mathbf{x}_t), \mathbf{x}_t - \mathbf{x} \rangle}{\|\nabla f(\mathbf{x}_t)\|} \leq D\sqrt{2T} + T\delta D,$$

where

$$f(\mathbf{x}_t) - f(\mathbf{x}) \leq \langle \nabla f(\mathbf{x}_t), \mathbf{x}_t - \mathbf{x} \rangle, \quad \forall t \in [T]$$

given that  $f$  is convex, and  $D = 2R$  is the diameter of  $\mathbb{B}_R(\mathbf{0})$ . Hence,

$$\min_{t \in [T]} f(\mathbf{x}_t) - f^* \leq \frac{\sum_{t=1}^T (f(\mathbf{x}_t) - f^*) / \|\nabla f(\mathbf{x}_t)\|}{\sum_{t=1}^T 1 / \|\nabla f(\mathbf{x}_t)\|} \leq \frac{2R\sqrt{2T} + 2T\delta R}{\sum_{t=1}^T 1 / \|\nabla f(\mathbf{x}_t)\|}.$$



Next, we proceed to bound the term  $\sum_{t=1}^T 1/\|\nabla f(\mathbf{x}_t)\|$  on the denominator. By the Cauchy-Schwarz inequality,

$$\left(\sum_{t=1}^T 1/\|\nabla f(\mathbf{x}_t)\|\right) \cdot \left(\sum_{t=1}^T \|\nabla f(\mathbf{x}_t)\|\right) \geq T^2,$$

which leads to

$$\sum_{t=1}^T \frac{1}{\|\nabla f(\mathbf{x}_t)\|} \geq \frac{T^2}{\sum_{t=1}^T \|\nabla f(\mathbf{x}_t)\|},$$

where

$$\begin{aligned} \sum_{t=1}^T \|\nabla f(\mathbf{x}_t)\| &= \sum_{t=1}^T \frac{\|\nabla f(\mathbf{x}_t)\|^2}{\|\nabla f(\mathbf{x}_t)\|} \\ &\leq \sum_{t=1}^T \frac{2L(f(\mathbf{x}_t) - f^*)}{\|\nabla f(\mathbf{x}_t)\|} \\ &\leq 2L \sum_{t=1}^T \frac{\langle \nabla f(\mathbf{x}_t), \mathbf{x}_t - \mathbf{x}^* \rangle}{\|\nabla f(\mathbf{x}_t)\|} \\ &\leq 2L(2R\sqrt{2T} + 2T\delta R), \end{aligned}$$

where the first inequality is by Lemma 8, the second inequality is by the convexity of  $f$ , and the third inequality is due to Lemma 9. Further we can derive that

$$\min_{t \in [T]} f(\mathbf{x}_t) - f^* \leq \frac{8R\sqrt{T} + 2T\delta R}{\sum_{t=1}^T 1/\|\nabla f(\mathbf{x}_t)\|} \leq \frac{2L(2R\sqrt{2T} + 2T\delta R)^2}{T^2}.$$

□

## C PROOF DETAILS OF NONCONVEX OPTIMIZATION BY COMPARISONS

### C.1 PROOF OF THEOREM 4

*Proof of Theorem 4.* We prove the correctness of Theorem 4 by contradiction. For any iteration  $t \in [T]$  with  $\|\nabla f(\mathbf{x}_t)\| > \epsilon$ , by Theorem 1 we have

$$\left\| \hat{\mathbf{g}}_t - \frac{\nabla f(\mathbf{x}_t)}{\|\nabla f(\mathbf{x}_t)\|} \right\| \leq \delta = \frac{1}{6},$$

indicating

$$\begin{aligned} f(\mathbf{x}_{t+1}) - f(\mathbf{x}_t) &\leq \langle \nabla f(\mathbf{x}_t), \mathbf{x}_{t+1} - \mathbf{x}_t \rangle + \frac{L}{2} \|\mathbf{x}_{t+1} - \mathbf{x}_t\|^2 \\ &\leq -\frac{\epsilon}{3L} \langle \nabla f(\mathbf{x}_t), \hat{\mathbf{g}}_t \rangle + \frac{L}{2} \left( \frac{\epsilon}{3L} \right)^2 \\ &\leq -\frac{\epsilon}{3L} \|\nabla f(\mathbf{x}_t)\| (1 - \delta) + \frac{\epsilon^2}{18L} \leq -\frac{2\epsilon^2}{9L}. \end{aligned}$$

That is to say, for any iteration  $t$  such that  $\mathbf{x}_t$  is not an  $\epsilon$ -FOSP, the function value will decrease at least  $\frac{2\epsilon^2}{9L}$  in this iteration. Furthermore, for any iteration  $t \in [T]$  with  $\frac{\epsilon}{12} < \|\nabla f(\mathbf{x}_t)\| \leq \epsilon$ , by Theorem 1 we have

$$\left\| \hat{\mathbf{g}}_t - \frac{\nabla f(\mathbf{x}_t)}{\|\nabla f(\mathbf{x}_t)\|} \right\| \leq \delta = \frac{1}{6},$$

indicating

$$\begin{aligned} f(\mathbf{x}_{t+1}) - f(\mathbf{x}_t) &\leq \langle \nabla f(\mathbf{x}_t), \mathbf{x}_{t+1} - \mathbf{x}_t \rangle + \frac{L}{2} \|\mathbf{x}_{t+1} - \mathbf{x}_t\|^2 \\ &\leq -\frac{\epsilon}{3L} \|\nabla f(\mathbf{x}_t)\| (1 - \delta) + \frac{\epsilon^2}{18L} \leq 0. \end{aligned} \tag{5}$$

For any iteration  $t \in [T]$  with  $\|\nabla f(\mathbf{x}_t)\| \leq \epsilon/12$ , we have

$$\begin{aligned} f(\mathbf{x}_{t+1}) - f(\mathbf{x}_t) &\leq \langle \nabla f(\mathbf{x}_t), \mathbf{x}_{t+1} - \mathbf{x}_t \rangle + \frac{L}{2} \|\mathbf{x}_{t+1} - \mathbf{x}_t\|^2 \\ &\leq \|\nabla f(\mathbf{x}_t)\| \cdot \|\mathbf{x}_{t+1} - \mathbf{x}_t\| + \frac{L}{2} \|\mathbf{x}_{t+1} - \mathbf{x}_t\|^2 \leq \frac{\epsilon^2}{12L}. \end{aligned}$$

Combining (5) and the above inequality, we know that for any iteration  $t$  such that  $\mathbf{x}_t$  is an  $\epsilon$ -FOSP, the function value increases at most  $\epsilon^2/(12L)$  in this iteration. Moreover, since

$$f(\mathbf{0}) - f(\mathbf{x}_T) \leq f(\mathbf{0}) - f^* \leq \Delta,$$

we can conclude that at least  $2/3$  of the iterations have  $\mathbf{x}_t$  being an  $\epsilon$ -FOSP, and randomly outputting one of them solves Problem 3 with success probability at least  $2/3$ .

The query complexity of Algorithm 4 only comes from the gradient direction estimation step in Line 3, which equals

$$T \cdot O(n \log(n/\delta)) = O(L\Delta n \log n / \epsilon^2).$$

□

## C.2 NEGATIVE CURVATURE FINDING BY COMPARISONS

In this subsection, we show how to find a negative curvature direction of a point  $\mathbf{x}$  satisfying  $\lambda_{\min}(\nabla^2 f(\mathbf{x})) \leq -\sqrt{\rho\epsilon}$ . Observe that the Hessian matrix  $\nabla^2 f(\mathbf{x})$  admits the following eigen-decomposition:

$$\nabla^2 f(\mathbf{x}) = \sum_{i=1}^n \lambda_i \mathbf{u}_i \mathbf{u}_i^\top, \quad (6)$$

where the vectors  $\{\mathbf{u}_i\}_{i=1}^n$  forms an orthonormal basis of  $\mathbb{R}^n$ . Without loss of generality we assume the eigenvalues  $\lambda_1, \lambda_2, \dots, \lambda_n$  corresponding to  $\mathbf{u}_1, \mathbf{u}_2, \dots, \mathbf{u}_n$  satisfy

$$\lambda_1 \leq \lambda_2 \leq \dots \leq \lambda_n, \quad (7)$$

where  $\lambda_1 \leq -\sqrt{\rho\epsilon}$ . Throughout this subsection, for any vector  $\mathbf{v} \in \mathbb{R}^n$ , we denote

$$\mathbf{v}_\perp := \mathbf{v} - \langle \mathbf{v}, \mathbf{u}_1 \rangle \mathbf{u}_1$$

to be the component of  $\mathbf{v}$  that is orthogonal to  $\mathbf{u}_1$ .

### C.2.1 NEGATIVE CURVATURE FINDING WHEN THE GRADIENT IS RELATIVELY SMALL

In this part, we present our negative curvature finding algorithm that finds the negative curvature of a point  $\mathbf{x}$  with  $\lambda_{\min}(\nabla^2 f(\mathbf{x})) \leq -\sqrt{\rho\epsilon}$  when the norm of the gradient  $\nabla f(\mathbf{x})$  is relatively small.

---

#### Algorithm 8: Comparison-based Negative Curvature Finding 1 (Comparison-NCF1)

---

**Input:** Function  $f: \mathbb{R}^n \rightarrow \mathbb{R}$ ,  $\mathbf{x}$ , precision  $\epsilon$ , error probability  $\delta$

```

1  $\mathcal{T} \leftarrow \frac{384L^2\sqrt{n}}{\delta\rho\epsilon} \log \frac{36nL}{\sqrt{\rho\epsilon}}, \hat{\delta} \leftarrow \frac{1}{8\mathcal{T}(\rho\epsilon)^{1/4}} \sqrt{\frac{\pi L}{n}}, r \leftarrow \frac{\pi\delta(\rho\epsilon)^{1/4}\sqrt{L}}{128\rho n\mathcal{T}}, \gamma \leftarrow \frac{\delta r}{16} \sqrt{\frac{\pi\rho\epsilon}{n}}$ 
2  $\mathbf{y}_0 \leftarrow \text{Uniform}(\mathcal{S}^{n-1})$ 
3 for  $t = 0, \dots, \mathcal{T} - 1$  do
4    $\hat{\mathbf{g}}_t \leftarrow \text{Comparison-GDE}(\mathbf{x} + r\mathbf{y}_t, \hat{\delta}, \gamma)$ 
5    $\bar{\mathbf{y}}_{t+1} \leftarrow \mathbf{y}_t - \frac{\delta}{16L} \sqrt{\frac{\rho\epsilon}{n}} \hat{\mathbf{g}}_t$ 
6    $\mathbf{y}_{t+1} \leftarrow \bar{\mathbf{y}}_{t+1} / \|\bar{\mathbf{y}}_{t+1}\|$ 
7 return  $\hat{\mathbf{e}} \leftarrow \mathbf{y}_{\mathcal{T}}$ 
```

---

**Lemma 10.** *In the setting of Problem 4, for any  $\mathbf{x}$  satisfying*

$$\|\nabla f(\mathbf{x})\| \leq L \left( \frac{\pi\delta}{256n\mathcal{T}} \right)^2 \sqrt{\frac{\epsilon}{\rho}}, \quad \lambda_{\min}(\nabla^2 f(\mathbf{x})) \leq -\sqrt{\rho\epsilon},$$

*Algorithm 8 outputs a unit vector  $\hat{\mathbf{e}}$  satisfying*

$$\hat{\mathbf{e}}^\top \nabla^2 f(\mathbf{x}) \hat{\mathbf{e}} \leq -\sqrt{\rho\epsilon}/4,$$

*with success probability at least  $1 - \delta$  using*

$$O \left( \frac{L^2 n^{3/2}}{\delta \rho \epsilon} \log^2 \frac{nL}{\delta \sqrt{\rho \epsilon}} \right)$$

*queries.*

To prove Lemma 10, without loss of generality we assume  $\mathbf{x} = \mathbf{0}$  by shifting  $\mathbb{R}^n$  such that  $\mathbf{x}$  is mapped to  $\mathbf{0}$ . We denote  $\mathbf{z}_t := r\mathbf{y}_t/\|\mathbf{y}_t\|$  for each iteration  $t \in [\mathcal{T}]$  of Algorithm 8.

**Lemma 11.** *In the setting of Problem 4, for any iteration  $t \in [\mathcal{T}]$  of Algorithm 8 with  $|y_{t,1}| \geq \frac{\delta}{8} \sqrt{\frac{\pi}{n}}$ , we have*

$$\|\nabla f(\mathbf{z}_t)\| \geq \frac{\delta r}{16} \sqrt{\frac{\pi \rho \epsilon}{n}}.$$

*Proof.* Observe that

$$\begin{aligned} \|\nabla f(\mathbf{z}_k)\| &\geq |\nabla_1 f(\mathbf{z}_k)| \\ &= |\nabla_1 f(\mathbf{0}) + (\nabla^2 f(\mathbf{0})\mathbf{z}_k)_1 + \nabla_1 f(\mathbf{z}_k) - \nabla_1 f(\mathbf{0}) - (\nabla^2 f(\mathbf{0})\mathbf{z}_k)_1| \\ &\geq |(\nabla^2 f(\mathbf{0})\mathbf{z}_k)_1| - |\nabla_1 f(\mathbf{0})| - |\nabla_1 f(\mathbf{z}_k) - \nabla_1 f(\mathbf{0}) - (\nabla^2 f(\mathbf{0})\mathbf{z}_k)_1|. \end{aligned}$$

Given that  $f$  is  $\rho$ -Hessian Lipschitz, we have

$$|\nabla_1 f(\mathbf{z}_k) - \nabla_1 f(\mathbf{0}) - (\nabla^2 f(\mathbf{0})\mathbf{z}_k)_1| \leq \frac{\rho \|\mathbf{z}_k\|^2}{2} = \frac{\rho r^2}{2} \leq \frac{\delta r}{32} \sqrt{\frac{\pi \rho \epsilon}{n}}.$$

Moreover, we have

$$|(\nabla^2 f(\mathbf{0})\mathbf{z}_k)_1| = \sqrt{\rho\epsilon} \|\mathbf{z}_{k,1}\| \geq \frac{\delta r}{8} \sqrt{\frac{\pi \rho \epsilon}{n}},$$

which leads to

$$\begin{aligned} \|\nabla f(\mathbf{z}_k)\| &\geq |\nabla_1 f(\mathbf{z}_k)| \\ &\geq |(\nabla^2 f(\mathbf{0})\mathbf{z}_k)_1| - |\nabla_1 f(\mathbf{0})| - |\nabla_1 f(\mathbf{z}_k) - \nabla_1 f(\mathbf{0}) - (\nabla^2 f(\mathbf{0})\mathbf{z}_k)_1| \\ &\geq \frac{\delta r}{16} \sqrt{\frac{\pi \rho \epsilon}{n}}, \end{aligned}$$

where the last inequality is due to the fact that

$$\|\nabla_1 f(\mathbf{0})\| \leq \|\nabla f(\mathbf{0})\| \leq \frac{\pi \delta r (\rho \epsilon)^{1/4} \sqrt{L}}{256nT} \leq \frac{\delta r}{32} \sqrt{\frac{\pi \rho \epsilon}{n}}.$$

□

**Lemma 12.** *In the setting of Problem 4, for any iteration  $t \in [\mathcal{T}]$  of Algorithm 8 we have*

$$|y_{t,1}| \geq \frac{\delta}{8} \sqrt{\frac{\pi}{n}} \tag{8}$$

*if  $|y_{0,1}| \geq \frac{\delta}{2} \sqrt{\frac{\pi}{n}}$  and  $\|\nabla f(\mathbf{0})\| \leq \frac{\delta r}{32} \sqrt{\frac{\pi \rho \epsilon}{n}}$ .*

*Proof.* We use recurrence to prove this lemma. In particular, assume

$$\frac{|y_{t,1}|}{\|\mathbf{y}_{t,\perp}\|} \geq \frac{\delta}{2} \sqrt{\frac{\pi}{n}} \left(1 - \frac{1}{2\mathcal{T}}\right)^t \quad (9)$$

is true for all  $t \leq k$  for some  $k$ , which guarantees that

$$|y_{t,1}| \geq \frac{\delta}{4} \sqrt{\frac{\pi}{n}} \left(1 - \frac{1}{2\mathcal{T}}\right)^t$$

Then for  $t = k + 1$ , we have

$$\bar{\mathbf{y}}_{k+1,\perp} = \mathbf{y}_{k,\perp} - \frac{\delta}{16L} \sqrt{\frac{\rho\epsilon}{n}} \cdot \hat{\mathbf{g}}_{k,\perp},$$

and

$$\|\bar{\mathbf{y}}_{k+1,\perp}\| \leq \left\| \mathbf{y}_{k,\perp} - \frac{\delta}{16L} \sqrt{\frac{\rho\epsilon}{n}} \cdot \frac{\nabla_{\perp} f(\mathbf{z}_k)}{\|\nabla f(\mathbf{z}_k)\|} \right\| + \frac{\delta}{16L} \sqrt{\frac{\rho\epsilon}{n}} \left\| \hat{\mathbf{g}}_{k,\perp} - \frac{\nabla_{\perp} f(\mathbf{z}_k)}{\|\nabla f(\mathbf{z}_k)\|} \right\|. \quad (10)$$

Since  $\|f(\mathbf{z}_t)\| \geq \frac{\delta r}{16} \sqrt{\frac{\pi\rho\epsilon}{n}}$  by Lemma 11, we have

$$\frac{\delta}{16L} \sqrt{\frac{\rho\epsilon}{n}} \left\| \hat{\mathbf{g}}_{k,\perp} - \frac{\nabla_{\perp} f(\mathbf{z}_k)}{\|\nabla f(\mathbf{z}_k)\|} \right\| \leq \frac{\delta}{16L} \sqrt{\frac{\rho\epsilon}{n}} \left\| \hat{\mathbf{g}}_k - \frac{\nabla f(\mathbf{z}_k)}{\|\nabla f(\mathbf{z}_k)\|} \right\| \leq \frac{\delta \hat{\delta}}{16L} \sqrt{\frac{\rho\epsilon}{n}} \leq \frac{\delta}{64\mathcal{T}\sqrt{n}}.$$

by Theorem 1. Moreover, observe that

$$\begin{aligned} \nabla_{\perp} f(\mathbf{z}_k) &= (\nabla^2 f(\mathbf{0})\mathbf{z}_k)_{\perp} + \nabla_{\perp} f(\mathbf{0}) + (\nabla_{\perp} f(\mathbf{z}_k) - \nabla_{\perp} f(\mathbf{0}) - (\nabla^2 f(\mathbf{0})\mathbf{z}_k)_{\perp}) \\ &= \nabla^2 f(\mathbf{0})\mathbf{z}_{k,\perp} + \nabla_{\perp} f(\mathbf{0}) + (\nabla_{\perp} f(\mathbf{z}_k) - \nabla_{\perp} f(\mathbf{0}) - (\nabla^2 f(\mathbf{0})\mathbf{z}_k)_{\perp}), \end{aligned} \quad (11)$$

where the norm of

$$\sigma_{k,\perp} := \nabla_{\perp} f(\mathbf{z}_k) - \nabla_{\perp} f(\mathbf{0}) - (\nabla^2 f(\mathbf{0})\mathbf{z}_k)_{\perp}$$

is upper bounded by

$$\frac{\rho r^2}{2} + \frac{\pi \delta r (\rho\epsilon)^{1/4} \sqrt{L}}{256n\mathcal{T}} \leq \frac{\pi \delta r (\rho\epsilon)^{1/4} \sqrt{L}}{128n\mathcal{T}} \leq \frac{\delta r}{16} \sqrt{\frac{\pi\rho\epsilon}{n}}$$

given that  $f$  is  $\rho$ -Hessian Lipschitz and  $\|\nabla f(\mathbf{0})\| \leq \frac{\delta r}{32} \sqrt{\frac{\pi\rho\epsilon}{n}}$ . Next, we proceed to bound the first term on the RHS of (10), where

$$\begin{aligned} \mathbf{y}_{k,\perp} - \frac{\delta}{16L} \sqrt{\frac{\rho\epsilon}{n}} \cdot \frac{\nabla_{\perp} f(\mathbf{z}_k)}{\|\nabla f(\mathbf{z}_k)\|} &= \mathbf{y}_{k,\perp} - \frac{\delta}{16L} \sqrt{\frac{\rho\epsilon}{n}} \cdot \frac{\nabla_{\perp} f(\mathbf{z}_k)}{\|\nabla f(\mathbf{z}_k)\|} \\ &= \mathbf{y}_{k,\perp} - \frac{\delta}{16L} \sqrt{\frac{\rho\epsilon}{n}} \cdot \frac{\nabla^2 f(\mathbf{0})\mathbf{z}_{k,\perp}}{\|\nabla f(\mathbf{z}_k)\|} - \frac{\delta}{16L} \sqrt{\frac{\rho\epsilon}{n}} \cdot \frac{\sigma_{k,\perp}}{\|\nabla f(\mathbf{z}_k)\|}, \end{aligned}$$

where

$$\nabla^2 f(\mathbf{0})\mathbf{z}_{k,\perp} = \sum_{i=2}^n \lambda_i \langle \mathbf{z}_{k,\perp}, \mathbf{u}_i \rangle \mathbf{u}_i = r \sum_{i=2}^n \lambda_i \langle \mathbf{y}_{k,\perp}, \mathbf{u}_i \rangle \mathbf{u}_i,$$

and

$$\mathbf{y}_{k,\perp} - \frac{\delta}{16L} \sqrt{\frac{\rho\epsilon}{n}} \cdot \frac{\nabla^2 f(\mathbf{0})\mathbf{z}_{k,\perp}}{\|\nabla f(\mathbf{z}_k)\|} = \sum_{i=2}^n \left(1 - \frac{r\delta}{16\|\nabla f(\mathbf{z}_k)\|} \sqrt{\frac{\rho\epsilon}{n}} \frac{\lambda_i}{L}\right) \langle \mathbf{y}_{k,\perp}, \mathbf{u}_i \rangle \mathbf{u}_i.$$

Given that

$$-1 \leq \frac{r\delta}{16\|\nabla f(\mathbf{z}_k)\|} \sqrt{\frac{\rho\epsilon}{n}} \frac{\lambda_i}{L} \leq 1$$

is always true, we have

$$\begin{aligned} \left\| \mathbf{y}_{k,\perp} - \frac{\delta}{16L} \sqrt{\frac{\rho\epsilon}{n}} \cdot \frac{\nabla^2 f(\mathbf{0}) \mathbf{z}_{k,\perp}}{\|\nabla f(\mathbf{z}_k)\|} \right\| &\leq \left\| \sum_{i=2}^n \left( 1 + \frac{r\delta\rho\epsilon}{16\|\nabla f(\mathbf{z}_k)\|L\sqrt{n}} \right) \langle \mathbf{y}_{k,\perp}, \mathbf{u}_i \rangle \mathbf{u}_i \right\| \\ &\leq \left( 1 + \frac{r\delta\rho\epsilon}{16\|\nabla f(\mathbf{z}_k)\|L\sqrt{n}} \right) \|\mathbf{y}_{k,\perp}\| \end{aligned}$$

and

$$\begin{aligned} \left\| \mathbf{y}_{k,\perp} - \frac{\delta}{16L} \sqrt{\frac{\rho\epsilon}{n}} \cdot \frac{\nabla_{\perp} f(\mathbf{z}_k)}{\|\nabla f(\mathbf{z}_k)\|} \right\| &\leq \left( 1 + \frac{r\delta\rho\epsilon}{16\|\nabla f(\mathbf{z}_k)\|L\sqrt{n}} \right) \|\mathbf{y}_{k,\perp}\| + \left\| \frac{\delta}{16L} \sqrt{\frac{\rho\epsilon}{n}} \cdot \frac{\sigma_{k,\perp}}{\|\nabla f(\mathbf{z}_k)\|} \right\| \\ &\leq \left( 1 + \frac{r\delta\rho\epsilon}{16\|\nabla f(\mathbf{z}_k)\|L\sqrt{n}} \right) \|\mathbf{y}_{k,\perp}\| + \frac{\delta}{64\mathcal{T}\sqrt{n}}. \end{aligned}$$

Combined with (10), we can derive that

$$\|\bar{\mathbf{y}}_{k+1,\perp}\| \leq \left\| \mathbf{y}_{k,\perp} - \frac{\delta}{16L} \sqrt{\frac{\rho\epsilon}{n}} \cdot \frac{\nabla_{\perp} f(\mathbf{z}_k)}{\|\nabla f(\mathbf{z}_k)\|} \right\| + \frac{\delta}{16L} \sqrt{\frac{\rho\epsilon}{n}} \left\| \hat{\mathbf{g}}_{k,\perp} - \frac{\nabla_{\perp} f(\mathbf{z}_k)}{\|\nabla f(\mathbf{z}_k)\|} \right\| \quad (12)$$

$$\leq \left( 1 + \frac{r\delta\rho\epsilon}{16\|\nabla f(\mathbf{z}_k)\|L\sqrt{n}} \right) \|\mathbf{y}_{k,\perp}\| + \frac{\delta}{32\mathcal{T}\sqrt{n}}. \quad (13)$$

Similarly, we have

$$|\bar{y}_{k+1,1}| \geq \left| y_{k,1} - \frac{\delta}{16L} \sqrt{\frac{\rho\epsilon}{n}} \cdot \frac{\nabla_1 f(\mathbf{z}_k)}{\|\nabla f(\mathbf{z}_k)\|} \right| - \frac{\delta}{16L} \sqrt{\frac{\rho\epsilon}{n}} \left| \hat{g}_{k,1} - \frac{\nabla_1 f(\mathbf{z}_k)}{\|\nabla f(\mathbf{z}_k)\|} \right|, \quad (14)$$

where the second term on the RHS of (14) satisfies

$$\frac{\delta}{16L} \sqrt{\frac{\rho\epsilon}{n}} \left| \hat{g}_{k,1} - \frac{\nabla_1 f(\mathbf{z}_k)}{\|\nabla f(\mathbf{z}_k)\|} \right| \leq \frac{\delta}{16L} \sqrt{\frac{\rho\epsilon}{n}} \left\| \hat{\mathbf{g}}_k - \frac{\nabla f(\mathbf{z}_k)}{\|\nabla f(\mathbf{z}_k)\|} \right\| \leq \frac{\delta\hat{\delta}}{16L} \sqrt{\frac{\rho\epsilon}{n}} \leq \frac{\delta}{64\mathcal{T}\sqrt{n}},$$

by Theorem 1, whereas the first term on the RHS of (14) satisfies

$$\begin{aligned} y_{k,1} - \frac{\delta}{16L} \sqrt{\frac{\rho\epsilon}{n}} \cdot \frac{\nabla_1 f(\mathbf{z}_k)}{\|\nabla f(\mathbf{z}_k)\|} &= y_{k,1} - \frac{\delta}{16L} \sqrt{\frac{\rho\epsilon}{n}} \cdot \frac{\mathbf{u}_1^\top \nabla^2 f(\mathbf{0}) \mathbf{u}_1 y_{k,1}}{\|\nabla f(\mathbf{z}_k)\|} - \frac{\delta}{16L} \sqrt{\frac{\rho\epsilon}{n}} \cdot \frac{\sigma_{k,1}}{\|\nabla f(\mathbf{z}_k)\|} \\ &= \left( 1 + \frac{r\delta\rho\epsilon}{16\|\nabla f(\mathbf{z}_k)\|L\sqrt{n}} \right) y_{k,1} - \frac{\delta}{16L} \sqrt{\frac{\rho\epsilon}{n}} \cdot \frac{\sigma_{k,1}}{\|\nabla f(\mathbf{z}_k)\|}, \end{aligned}$$

where the absolute value of

$$\sigma_{k,1} := \nabla_1 f(\mathbf{z}_k) - \nabla_1 f(\mathbf{0}) - (\nabla^2 f(\mathbf{0}) \mathbf{z}_k)_1$$

is upper bounded by

$$\frac{\rho r^2}{2} + \frac{\pi \delta r (\rho\epsilon)^{1/4} \sqrt{L}}{256n\mathcal{T}} \leq \frac{\pi \delta r (\rho\epsilon)^{1/4} \sqrt{L}}{128n\mathcal{T}} \leq \frac{\delta r}{16} \sqrt{\frac{\pi \rho\epsilon}{n}}$$

given that  $f$  is  $\rho$ -Hessian Lipschitz and

$$\|\nabla f(\mathbf{0})\| \leq \frac{\pi \delta r (\rho\epsilon)^{1/4} \sqrt{L}}{256nT}.$$

Combined with (14), we can derive that

$$\begin{aligned} |\bar{y}_{k+1,1}| &\geq \left| y_{k,1} - \frac{\delta}{16L} \sqrt{\frac{\rho\epsilon}{n}} \cdot \frac{\nabla_1 f(\mathbf{z}_k)}{\|\nabla f(\mathbf{z}_k)\|} \right| - \frac{\delta}{16L} \sqrt{\frac{\rho\epsilon}{n}} \left| \hat{g}_{k,1} - \frac{\nabla_1 f(\mathbf{z}_k)}{\|\nabla f(\mathbf{z}_k)\|} \right| \\ &\geq \left( 1 + \frac{r\delta\rho\epsilon}{16\|\nabla f(\mathbf{z}_k)\|L\sqrt{n}} \right) |y_{k,1}| - \frac{\delta}{32\mathcal{T}\sqrt{n}}. \end{aligned}$$

Combined with (12), we have

$$\begin{aligned} \frac{|y_{k+1,1}|}{\|\mathbf{y}_{k+1,\perp}\|} &= \frac{|\bar{y}_{k+1,1}|}{\|\bar{\mathbf{y}}_{k+1,\perp}\|} \\ &\geq \frac{\left( 1 + \frac{r\delta\rho\epsilon}{16\|\nabla f(\mathbf{z}_k)\|L\sqrt{n}} \right) |y_{k,1}| - \frac{\delta}{32\mathcal{T}\sqrt{n}}}{\left( 1 + \frac{r\delta\rho\epsilon}{16\|\nabla f(\mathbf{z}_k)\|L\sqrt{n}} \right) \|\mathbf{y}_{k,\perp}\| + \frac{\delta}{32\mathcal{T}\sqrt{n}}}. \end{aligned}$$

Hence, if  $|y_{k,1}| \geq \frac{1}{2}$ , (9) is also true for  $t = k + 1$ . Otherwise, we have  $\|\mathbf{y}_{k,\perp}\| \geq \sqrt{3}/2$  and

$$\begin{aligned} \frac{|y_{k+1,1}|}{\|\mathbf{y}_{k+1,\perp}\|} &\geq \frac{\left(1 + \frac{r\delta\rho\epsilon}{16\|\nabla f(\mathbf{z}_k)\|L\sqrt{n}}\right) |y_{k,1}| - \frac{\delta}{32\mathcal{T}\sqrt{n}}}{\left(1 + \frac{r\delta\rho\epsilon}{16\|\nabla f(\mathbf{z}_k)\|L\sqrt{n}}\right) \|\mathbf{y}_{k,\perp}\| + \frac{\delta}{32\mathcal{T}\sqrt{n}}} \\ &\geq \frac{\left(1 + \frac{r\delta\rho\epsilon}{16\|\nabla f(\mathbf{z}_k)\|L\sqrt{n}} - \frac{1}{8\mathcal{T}}\right) |y_{k,1}|}{\left(1 + \frac{r\delta\rho\epsilon}{16\|\nabla f(\mathbf{z}_k)\|L\sqrt{n}} + \frac{1}{8\mathcal{T}}\right) \|\mathbf{y}_{k,\perp}\|} \\ &\geq \left(1 - \frac{1}{2\mathcal{T}}\right) \frac{|y_{k,1}|}{\|\mathbf{y}_{k,\perp}\|} \geq \frac{\delta}{2} \sqrt{\frac{\pi}{n}} \left(1 - \frac{1}{2\mathcal{T}}\right)^{k+1}. \end{aligned}$$

Thus, we can conclude that (9) is true for all  $t \in [\mathcal{T}]$ . This completes the proof.  $\square$

**Lemma 13.** *In the setting of Problem 4, for any  $i$  with  $\lambda_i \geq -\frac{\sqrt{\rho\epsilon}}{2}$ , the  $\mathcal{T}$ -th iteration of Algorithm 8 satisfies*

$$\frac{|y_{\mathcal{T},i}|}{|y_{\mathcal{T},1}|} \leq \frac{(\rho\epsilon)^{1/4}}{4\sqrt{nL}} \quad (15)$$

if  $|y_{0,1}| \geq \frac{\delta}{2} \sqrt{\frac{\pi}{n}}$  and  $\|\nabla f(\mathbf{0})\| \leq \frac{\delta r}{32} \sqrt{\frac{\pi\rho\epsilon}{n}}$ .

*Proof.* For any  $t \in [\mathcal{T} - 1]$ , similar to (14) in the proof of Lemma 12, we have

$$\bar{y}_{t+1,i} = y_{t,i} - \frac{\delta}{16L} \sqrt{\frac{\rho\epsilon}{n}} \cdot \hat{g}_{t,i},$$

and

$$|\bar{y}_{t+1,i}| \leq \left| y_{t,i} - \frac{\delta}{16L} \sqrt{\frac{\rho\epsilon}{n}} \cdot \frac{\nabla_i f(\mathbf{z}_t)}{\|\nabla f(\mathbf{z}_t)\|} \right| - \frac{\delta}{16L} \sqrt{\frac{\rho\epsilon}{n}} \left| \hat{g}_{t,i} - \frac{\nabla_i f(\mathbf{z}_t)}{\|\nabla f(\mathbf{z}_t)\|} \right|. \quad (16)$$

By Lemma 12 we have  $|y_{t,1}| \geq \frac{\delta}{8} \sqrt{\frac{\pi}{n}}$  for each  $t \in [\mathcal{T}]$ , which combined with Lemma 11 leads to  $\|\nabla f(\mathbf{z}_t)\| \geq \frac{\delta r}{16} \sqrt{\frac{\pi\rho\epsilon}{n}}$ . Thus, the second term on the RHS of (16) satisfies

$$\frac{\delta}{16L} \sqrt{\frac{\rho\epsilon}{n}} \left| \hat{g}_{t,i} - \frac{\nabla_i f(\mathbf{z}_t)}{\|\nabla f(\mathbf{z}_t)\|} \right| \leq \frac{\delta}{16L} \sqrt{\frac{\rho\epsilon}{n}} \left\| \hat{\mathbf{g}}_t - \frac{\nabla f(\mathbf{z}_t)}{\|\nabla f(\mathbf{z}_t)\|} \right\| \leq \frac{\delta \hat{\delta}}{16L} \sqrt{\frac{\rho\epsilon}{n}} \leq \frac{\delta(\rho\epsilon)^{1/4}}{128\mathcal{T}n} \sqrt{\frac{\pi}{L}}$$

by Theorem 1. Moreover, the first term on the RHS of (16) satisfies

$$\begin{aligned} y_{t,i} - \frac{\delta}{16L} \sqrt{\frac{\rho\epsilon}{n}} \cdot \frac{\nabla_i f(\mathbf{z}_t)}{\|\nabla f(\mathbf{z}_t)\|} &= y_{t,i} - \frac{\delta}{16L} \sqrt{\frac{\rho\epsilon}{n}} \cdot \frac{\mathbf{u}_i^\top \nabla^2 f(\mathbf{0}) \mathbf{u}_i y_{t,i}}{\|\nabla f(\mathbf{z}_t)\|} - \frac{\delta}{16L} \sqrt{\frac{\rho\epsilon}{n}} \cdot \frac{\sigma_{t,i}}{\|\nabla f(\mathbf{z}_t)\|} \\ &\leq \left(1 + \frac{r\delta\rho\epsilon}{32\|\nabla f(\mathbf{z}_t)\|L\sqrt{n}}\right) y_{t,i} - \frac{\delta}{16L} \sqrt{\frac{\rho\epsilon}{n}} \cdot \frac{\sigma_{t,i}}{\|\nabla f(\mathbf{z}_t)\|}, \end{aligned}$$

where the absolute value of

$$\sigma_{t,i} := \nabla_i f(\mathbf{z}_t) - \nabla_i f(\mathbf{0}) - (\nabla^2 f(\mathbf{0}) \mathbf{z}_t)_i$$

is upper bounded by

$$\frac{\rho r^2}{2} + \frac{\pi \delta r (\rho\epsilon)^{1/4} \sqrt{L}}{256n\mathcal{T}} \leq \frac{\pi \delta r (\rho\epsilon)^{1/4} \sqrt{L}}{128n\mathcal{T}}$$

given that  $f$  is  $\rho$ -Hessian Lipschitz and

$$\|\nabla f(\mathbf{0})\| \leq \frac{\pi \delta r (\rho\epsilon)^{1/4} \sqrt{L}}{256n\mathcal{T}}.$$

Combined with (16), we can derive that

$$\begin{aligned} |\bar{y}_{t+1,i}| &\leq \left| y_{t,i} - \frac{\delta}{16L} \sqrt{\frac{\rho\epsilon}{n}} \cdot \frac{\nabla_i f(\mathbf{z}_t)}{\|\nabla f(\mathbf{z}_t)\|} \right| + \frac{\delta}{16L} \sqrt{\frac{\rho\epsilon}{n}} \left| \hat{g}_{t,i} - \frac{\nabla_i f(\mathbf{z}_t)}{\|\nabla f(\mathbf{z}_t)\|} \right| \\ &\leq \left(1 + \frac{r\delta\rho\epsilon}{32\|\nabla f(\mathbf{z}_t)\|L\sqrt{n}}\right) |y_{t,i}| + \frac{\delta(\rho\epsilon)^{1/4}}{64\mathcal{T}n} \sqrt{\frac{\pi}{L}}. \end{aligned}$$

Considering that  $|y_{t,1}| \geq \frac{\delta}{8} \sqrt{\frac{\pi}{n}}$ ,

$$\begin{aligned} |\bar{y}_{t+1,1}| &\geq \left| y_{t,1} - \frac{\delta}{16L} \sqrt{\frac{\rho\epsilon}{n}} \cdot \frac{\nabla_1 f(\mathbf{z}_t)}{\|\nabla f(\mathbf{z}_t)\|} \right| - \frac{\delta}{16L} \sqrt{\frac{\rho\epsilon}{n}} \left| \hat{g}_{t,1} - \frac{\nabla_1 f(\mathbf{z}_t)}{\|\nabla f(\mathbf{z}_t)\|} \right| \\ &\geq \left( 1 + \frac{r\delta\rho\epsilon}{16\|\nabla f(\mathbf{z}_t)\|L\sqrt{n}} \right) |y_{t,1}| - \frac{\delta(\rho\epsilon)^{1/4}}{64\mathcal{T}n} \sqrt{\frac{\pi}{L}} \\ &\geq \left( 1 + \frac{r\delta\rho\epsilon}{24\|\nabla f(\mathbf{z}_t)\|L\sqrt{n}} \right) |y_{t,1}|, \end{aligned}$$

where the last inequality is due to the fact that  $|y_{t,1}| \geq \frac{\delta}{8} \sqrt{\frac{\pi}{n}}$  by Lemma 12. Hence, for any  $t \in [\mathcal{T} - 1]$  we have

$$\begin{aligned} \frac{|y_{t+1,i}|}{|y_{t+1,1}|} &= \frac{|\bar{y}_{t+1,i}|}{|\bar{y}_{t+1,1}|} \\ &\leq \frac{\left( 1 + \frac{r\delta\rho\epsilon}{32\|\nabla f(\mathbf{z}_t)\|L\sqrt{n}} \right) |y_{t,i}| + \frac{\delta(\rho\epsilon)^{1/4}}{64\mathcal{T}n} \sqrt{\frac{\pi}{L}}}{\left( 1 + \frac{r\delta\rho\epsilon}{24\|\nabla f(\mathbf{z}_t)\|L\sqrt{n}} \right) |y_{t,1}|} \\ &\leq \frac{\left( 1 + \frac{r\delta\rho\epsilon}{32\|\nabla f(\mathbf{z}_t)\|L\sqrt{n}} \right) |y_{t,i}|}{\left( 1 + \frac{r\delta\rho\epsilon}{24\|\nabla f(\mathbf{z}_t)\|L\sqrt{n}} \right) |y_{t,1}|} + \frac{(\rho\epsilon)^{1/4}}{8\mathcal{T}\sqrt{nL}} \\ &\leq \left( 1 - \frac{r\delta\rho\epsilon}{192\|\nabla f(\mathbf{z}_t)\|L\sqrt{n}} \right) \frac{|y_{t,i}|}{|y_{t,1}|} + \frac{(\rho\epsilon)^{1/4}}{8\mathcal{T}\sqrt{nL}}. \end{aligned}$$

Since  $f$  is  $L$ -smooth, we have

$$\|\nabla f(\mathbf{z}_t)\| \leq \|\nabla f(\mathbf{0})\| + L\|\mathbf{z}_t\| \leq 2Lr,$$

which leads to

$$\begin{aligned} \frac{|y_{t+1,i}|}{|y_{t+1,1}|} &\leq \left( 1 - \frac{r\delta\rho\epsilon}{192\|\nabla f(\mathbf{z}_t)\|L\sqrt{n}} \right) \frac{|y_{t,i}|}{|y_{t,1}|} + \frac{(\rho\epsilon)^{1/4}}{8\mathcal{T}\sqrt{nL}} \\ &\leq \left( 1 - \frac{\delta\rho\epsilon}{384L^2\sqrt{n}} \right) \frac{|y_{t,i}|}{|y_{t,1}|} + \frac{(\rho\epsilon)^{1/4}}{8\mathcal{T}\sqrt{nL}}. \end{aligned}$$

Thus,

$$\begin{aligned} \frac{|y_{\mathcal{T},i}|}{|y_{\mathcal{T},1}|} &\leq \left( 1 - \frac{\delta\rho\epsilon}{384L^2\sqrt{n}} \right)^{\mathcal{T}} \frac{|y_{0,i}|}{|y_{0,1}|} + \sum_{t=1}^{\mathcal{T}} \frac{(\rho\epsilon)^{1/4}}{6\mathcal{T}\sqrt{nL}} \left( 1 - \frac{\delta\rho\epsilon}{384L^2\sqrt{n}} \right)^{\mathcal{T}-t} \\ &\leq \left( 1 - \frac{\delta\rho\epsilon}{384L^2\sqrt{n}} \right)^{\mathcal{T}} \frac{|y_{0,i}|}{|y_{0,1}|} + \frac{(\rho\epsilon)^{1/4}}{8\sqrt{nL}} \leq \frac{(\rho\epsilon)^{1/4}}{4\sqrt{nL}}. \end{aligned}$$

□

Equipped with Lemma 13, we are now ready to prove Lemma 10.

*Proof of Lemma 10.* We consider the case where  $|y_{0,1}| \geq \frac{\delta}{2} \sqrt{\frac{\pi}{n}}$ , which happens with probability

$$\Pr \left\{ |y_{0,1}| \geq \frac{\delta}{2} \sqrt{\frac{\pi}{n}} \right\} \geq 1 - \frac{\delta}{2} \sqrt{\frac{\pi}{n}} \cdot \frac{\text{Vol}(\mathcal{S}^{n-2})}{\text{Vol}(\mathcal{S}^{n-1})} \geq 1 - \delta.$$

In this case, by Lemma 13 we have

$$|y_{\mathcal{T},1}|^2 = \frac{|y_{\mathcal{T},1}|^2}{\sum_{i=1}^n |y_{\mathcal{T},i}|^2} = \left( 1 + \sum_{i=2}^n \left( \frac{|y_{\mathcal{T},i}|}{|y_{\mathcal{T},1}|} \right)^2 \right)^{-1} \geq \left( 1 + \frac{\sqrt{\rho\epsilon}}{16L} \right)^{-1} \geq 1 - \frac{\sqrt{\rho\epsilon}}{8L},$$

and

$$\|\mathbf{y}_{\mathcal{T},\perp}\|^2 = 1 - |y_{\mathcal{T},1}|^2 \leq \frac{\sqrt{\rho\epsilon}}{8L}.$$

Let  $s$  be the smallest integer such that  $\lambda_s \geq 0$ . Then the output  $\hat{\mathbf{e}} = \mathbf{y}_{\mathcal{T}}$  of Algorithm 8 satisfies

$$\begin{aligned} \hat{\mathbf{e}}^\top \nabla^2 f(\mathbf{x}) \hat{\mathbf{e}} &= |y_{\mathcal{T},1}|^2 \mathbf{u}_1^\top \nabla^2 f(\mathbf{x}) \mathbf{u}_1 + \mathbf{y}_{\mathcal{T},\perp}^\top \nabla^2 f(\mathbf{x}) \mathbf{y}_{\mathcal{T},\perp} \\ &\leq -\sqrt{\rho\epsilon} \cdot |y_{\mathcal{T},1}|^2 + L \sum_{i=s}^d \|\mathbf{y}_{\mathcal{T},i}\|^2 \\ &\leq -\sqrt{\rho\epsilon} \cdot |y_{\mathcal{T},1}|^2 + L \|\mathbf{y}_{\mathcal{T},\perp}\|^2 \leq -\frac{\sqrt{\rho\epsilon}}{4}. \end{aligned}$$

The query complexity of Algorithm 8 only comes from the gradient direction estimation step in Line 4, which equals

$$\mathcal{T} \cdot O\left(n \log\left(n/\hat{\delta}\right)\right) = O\left(\frac{L^2 n^{3/2}}{\delta \rho \epsilon} \log^3 \frac{nL}{\delta \sqrt{\rho\epsilon}}\right).$$

□

### C.2.2 NEGATIVE CURVATURE FINDING WHEN THE GRADIENT IS RELATIVELY LARGE

In this part, we present our negative curvature finding algorithm that finds the negative curvature of a point  $\mathbf{x}$  with  $\lambda_{\min}(\nabla^2 f(\mathbf{x})) \leq -\sqrt{\rho\epsilon}$  when the norm of the gradient  $\nabla f(\mathbf{x})$  is relatively large.

---

#### Algorithm 9: Comparison-based Negative Curvature Finding 2 (Comparison-NCF2)

---

**Input:** Function  $f: \mathbb{R}^n \rightarrow \mathbb{R}$ ,  $\mathbf{x}$ , precision  $\epsilon$ , error probability  $\delta$

```

1  $\mathcal{T} \leftarrow \frac{384L^2\sqrt{n}}{\delta\rho\epsilon} \log \frac{36nL}{\sqrt{\rho\epsilon}}, \hat{\delta} \leftarrow \frac{1}{8\mathcal{T}(\rho\epsilon)^{1/4}} \sqrt{\frac{\pi L}{n}}, \gamma_{\mathbf{x}} \leftarrow \frac{\pi\delta r(\rho\epsilon)^{1/4}\sqrt{L}}{256n\mathcal{T}}, \gamma_{\mathbf{y}} \leftarrow \frac{\delta}{8} \sqrt{\frac{\pi}{n}}$ 
2  $\mathbf{y}_0 \leftarrow \text{Uniform}(\mathcal{S}^{n-1})$ 
3 for  $t = 0, \dots, \mathcal{T} - 1$  do
4    $\hat{\mathbf{g}}_t \leftarrow \text{Comparison-Hessian-Vector}(\mathbf{x}, \mathbf{y}_t, \hat{\delta}, \gamma_{\mathbf{x}}, \gamma_{\mathbf{y}})$ 
5    $\tilde{\mathbf{y}}_{t+1} \leftarrow \mathbf{y}_t - \frac{\delta}{16L} \sqrt{\frac{\rho\epsilon}{n}} \hat{\mathbf{g}}_t$ 
6    $\mathbf{y}_{t+1} \leftarrow \mathbf{y}_{t+1} / \|\mathbf{y}_{t+1}\|$ 
7 return  $\hat{\mathbf{e}} \leftarrow \mathbf{y}_{\mathcal{T}}$ 
```

---

The subroutine Comparison-Hessian-Vector in Line 4 of Algorithm 9 is given as Algorithm 10, whose output approximates the Hessian-vector product  $\nabla^2 f(\mathbf{x}) \cdot \mathbf{y}_t$ .

---

#### Algorithm 10: Comparison-based Hessian-vector product (Comparison-Hessian-Vector)

---

**Input:** Function  $f: \mathbb{R}^n \rightarrow \mathbb{R}$ ,  $\mathbf{x}, \mathbf{y} \in \mathbb{R}^n$ , precision  $\hat{\delta}$ , lower bound  $\gamma_{\mathbf{x}}$  on  $\|\nabla f(\mathbf{x})\|$ , lower bound  $\gamma_{\mathbf{y}}$  on  $|y_1|$

```

1 Set  $r_0 \leftarrow \min \left\{ \frac{\gamma_{\mathbf{x}}}{100L}, \frac{\gamma_{\mathbf{x}}}{100\rho}, \frac{\sqrt{\gamma_{\mathbf{x}}\hat{\delta}}}{20\sqrt{\rho}}, \frac{\gamma_{\mathbf{y}}\hat{\delta}\sqrt{\epsilon}}{20\sqrt{\rho}} \right\}$ 
2  $\hat{\mathbf{g}}_0 \leftarrow \text{Comparison-GDE}(\mathbf{x}, \frac{\rho r_0^2}{\gamma_{\mathbf{x}}}, \gamma_{\mathbf{x}}), \hat{\mathbf{g}}_1 \leftarrow \text{Comparison-GDE}(\mathbf{x} + r_0 \mathbf{y}, \frac{\rho r_0^2}{\gamma_{\mathbf{x}}}, \gamma_{\mathbf{x}}/2),$ 
    $\hat{\mathbf{g}}_{-1} \leftarrow \text{Comparison-GDE}(\mathbf{x} - r_0 \mathbf{y}, \frac{\rho r_0^2}{\gamma_{\mathbf{x}}}, \gamma_{\mathbf{x}}/2)$ 
3 Set  $\mathbf{g} = \sqrt{1 - \langle \hat{\mathbf{g}}_{-1}, \hat{\mathbf{g}}_0 \rangle^2} \hat{\mathbf{g}}_1 - \sqrt{1 - \langle \hat{\mathbf{g}}_1, \hat{\mathbf{g}}_0 \rangle^2} \hat{\mathbf{g}}_{-1}$ 
4 return  $\hat{\mathbf{g}} = \mathbf{g} / \|\mathbf{g}\|$ 
```

---

**Lemma 14.** In the setting of Problem 4, for any  $\mathbf{x}, \mathbf{y} \in \mathbb{R}^d$  satisfying

$$\|\nabla f(\mathbf{x})\| \geq \gamma_{\mathbf{x}}, \quad \lambda_{\min}(\nabla^2 f(\mathbf{x})) \leq -\sqrt{\rho\epsilon}, \quad \|\mathbf{y}\| = 1, \quad |y_1| \geq \gamma_{\mathbf{y}},$$

Algorithm 10 outputs a vector  $\hat{\mathbf{g}}$  satisfying

$$\left\| \hat{\mathbf{g}} - \frac{\nabla^2 f(\mathbf{x}) \cdot \mathbf{y}}{\|\nabla^2 f(\mathbf{x}) \cdot \mathbf{y}\|} \right\| \leq \hat{\delta}$$

using  $O(n \log(n \rho L^2 / \gamma_{\mathbf{x}} \gamma_{\mathbf{y}}^2 \epsilon \hat{\delta}^2))$  queries.



*Proof of Lemma 14.* Since  $f$  is a  $\rho$ -Hessian Lipschitz function,

$$\|\nabla f(\mathbf{x} + r_0 \mathbf{y}) - \nabla f(\mathbf{x}) - r_0 \nabla^2 f(\mathbf{x}) \cdot \mathbf{y}\| \leq \frac{\rho}{2} r_0^2; \quad (17)$$

$$\|\nabla f(\mathbf{x} - r_0 \mathbf{y}) - \nabla f(\mathbf{x}) + r_0 \nabla^2 f(\mathbf{x}) \cdot \mathbf{y}\| \leq \frac{\rho}{2} r_0^2. \quad (18)$$

Therefore,

$$\|\nabla f(\mathbf{x} + r_0 \mathbf{y}) + \nabla f(\mathbf{x} - r_0 \mathbf{y}) - 2\nabla f(\mathbf{x})\| \leq \rho r_0^2; \quad (19)$$

$$\left\| \nabla^2 f(\mathbf{x}) \cdot \mathbf{y} - \frac{1}{2r_0} (\nabla f(\mathbf{x} + r_0 \mathbf{y}) - \nabla f(\mathbf{x} - r_0 \mathbf{y})) \right\| \leq \frac{\rho}{2} r_0. \quad (20)$$

Furthermore, because  $r_0 \leq \frac{\gamma_{\mathbf{x}}}{100L}$  and  $f$  is  $L$ -smooth,

$$\|\nabla f(\mathbf{x} + r_0 \mathbf{y})\|, \|\nabla f(\mathbf{x} - r_0 \mathbf{y})\| \geq \gamma_{\mathbf{x}} - L \cdot \frac{\gamma_{\mathbf{x}}}{100L} = 0.99\gamma_{\mathbf{x}}.$$

We first understand how to approximate  $\nabla^2 f(\mathbf{x}) \cdot \mathbf{y}$  by normalized vectors  $\frac{\nabla f(\mathbf{x})}{\|\nabla f(\mathbf{x})\|}$ ,  $\frac{\nabla f(\mathbf{x} + r_0 \mathbf{y})}{\|\nabla f(\mathbf{x} + r_0 \mathbf{y})\|}$ ,  $\frac{\nabla f(\mathbf{x} - r_0 \mathbf{y})}{\|\nabla f(\mathbf{x} - r_0 \mathbf{y})\|}$ , and then analyze the approximation error due to using  $\hat{\mathbf{g}}_0, \hat{\mathbf{g}}_1, \hat{\mathbf{g}}_{-1}$ , respectively. By Lemma 7, we have

$$\begin{aligned} & \frac{1}{2\|\nabla f(\mathbf{x})\|} \frac{\|\nabla f(\mathbf{x}) - r_0 \nabla^2 f(\mathbf{x}) \cdot \mathbf{y}\|}{\sqrt{1 - \left\langle \frac{\nabla f(\mathbf{x}) + r_0 \nabla^2 f(\mathbf{x}) \cdot \mathbf{y}}{\|\nabla f(\mathbf{x}) + r_0 \nabla^2 f(\mathbf{x}) \cdot \mathbf{y}\|}, \frac{\nabla f(\mathbf{x})}{\|\nabla f(\mathbf{x})\|} \right\rangle^2}} \\ &= \frac{1}{2\|\nabla f(\mathbf{x})\|} \frac{\|\nabla f(\mathbf{x}) + r_0 \nabla^2 f(\mathbf{x}) \cdot \mathbf{y}\|}{\sqrt{1 - \left\langle \frac{\nabla f(\mathbf{x}) - r_0 \nabla^2 f(\mathbf{x}) \cdot \mathbf{y}}{\|\nabla f(\mathbf{x}) - r_0 \nabla^2 f(\mathbf{x}) \cdot \mathbf{y}\|}, \frac{\nabla f(\mathbf{x})}{\|\nabla f(\mathbf{x})\|} \right\rangle^2}} =: \alpha, \end{aligned} \quad (21)$$

i.e., we denote the value above as  $\alpha$ . Because  $f$  is  $\rho$ -Hessian Lipschitz,  $\|r_0 \nabla^2 f(\mathbf{x}) \cdot \mathbf{y}\| \leq r_0 \rho$ . Since  $r_0 \leq \frac{\gamma_{\mathbf{x}}}{100\rho}$ ,  $\|r_0 \nabla^2 f(\mathbf{x}) \cdot \mathbf{y}\| \leq \frac{\gamma_{\mathbf{x}}}{100}$ . Also note that by Lemma 6 we have

$$\left\langle \frac{\nabla f(\mathbf{x}) + r_0 \nabla^2 f(\mathbf{x}) \cdot \mathbf{y}}{\|\nabla f(\mathbf{x}) + r_0 \nabla^2 f(\mathbf{x}) \cdot \mathbf{y}\|}, \frac{\nabla f(\mathbf{x})}{\|\nabla f(\mathbf{x})\|} \right\rangle \geq 0.94, \quad \left\langle \frac{\nabla f(\mathbf{x}) - r_0 \nabla^2 f(\mathbf{x}) \cdot \mathbf{y}}{\|\nabla f(\mathbf{x}) - r_0 \nabla^2 f(\mathbf{x}) \cdot \mathbf{y}\|}, \frac{\nabla f(\mathbf{x})}{\|\nabla f(\mathbf{x})\|} \right\rangle \geq 0.94.$$

This promises that

$$\alpha \geq \frac{0.99}{2\sqrt{1 - 0.94^2}} \geq 1. \quad (22)$$

In arguments next, we say a vector  $\mathbf{u}$  is  $d$ -close to a vector  $\mathbf{v}$  if  $\|\mathbf{u} - \mathbf{v}\| \leq d$ . We prove that the vector

$$\begin{aligned} \tilde{\mathbf{g}}_1 := & \frac{\nabla f(\mathbf{x})}{\|\nabla f(\mathbf{x})\|} + \alpha \cdot \left( \sqrt{1 - \left\langle \frac{\nabla f(\mathbf{x} - r_0 \mathbf{y})}{\|\nabla f(\mathbf{x} - r_0 \mathbf{y})\|}, \frac{\nabla f(\mathbf{x})}{\|\nabla f(\mathbf{x})\|} \right\rangle^2} \frac{\nabla f(\mathbf{x} + r_0 \mathbf{y})}{\|\nabla f(\mathbf{x} + r_0 \mathbf{y})\|} \right. \\ & \left. - \sqrt{1 - \left\langle \frac{\nabla f(\mathbf{x} + r_0 \mathbf{y})}{\|\nabla f(\mathbf{x} + r_0 \mathbf{y})\|}, \frac{\nabla f(\mathbf{x})}{\|\nabla f(\mathbf{x})\|} \right\rangle^2} \frac{\nabla f(\mathbf{x} - r_0 \mathbf{y})}{\|\nabla f(\mathbf{x} - r_0 \mathbf{y})\|} \right) \end{aligned} \quad (23)$$

is  $\frac{\tau \rho r_0^2}{\gamma_{\mathbf{x}}}$ -close to a vector proportional to  $\nabla f(\mathbf{x} + r_0 \mathbf{y})$ . This is because (17), (18), and Lemma 5 imply that

$$\frac{\nabla f(\mathbf{x} + r_0 \mathbf{y})}{\|\nabla f(\mathbf{x} + r_0 \mathbf{y})\|} \quad \text{and} \quad \frac{\nabla f(\mathbf{x}) + r_0 \nabla^2 f(\mathbf{x}) \cdot \mathbf{y}}{\|\nabla f(\mathbf{x}) + r_0 \nabla^2 f(\mathbf{x}) \cdot \mathbf{y}\|}$$

are  $\frac{\rho r_0^2}{0.99\gamma_{\mathbf{x}}}$ -close to each other,

$$\sqrt{1 - \left\langle \frac{\nabla f(\mathbf{x} - r_0 \mathbf{y})}{\|\nabla f(\mathbf{x} - r_0 \mathbf{y})\|}, \frac{\nabla f(\mathbf{x})}{\|\nabla f(\mathbf{x})\|} \right\rangle^2} \frac{\nabla f(\mathbf{x} + r_0 \mathbf{y})}{\|\nabla f(\mathbf{x} + r_0 \mathbf{y})\|} \quad (24)$$

is proportional to  $\nabla f(\mathbf{x} + r_0 \mathbf{y})$ , and the definition of  $\alpha$  implies

$$\begin{aligned} & \frac{\nabla f(\mathbf{x})}{\|\nabla f(\mathbf{x})\|} - \alpha \sqrt{1 - \left\langle \frac{\nabla f(\mathbf{x}) + r_0 \nabla^2 f(\mathbf{x}) \cdot \mathbf{y}}{\|\nabla f(\mathbf{x}) + r_0 \nabla^2 f(\mathbf{x}) \cdot \mathbf{y}\|}, \frac{\nabla f(\mathbf{x})}{\|\nabla f(\mathbf{x})\|} \right\rangle^2} \frac{\nabla f(\mathbf{x}) - r_0 \nabla^2 f(\mathbf{x}) \cdot \mathbf{y}}{\|\nabla f(\mathbf{x}) - r_0 \nabla^2 f(\mathbf{x}) \cdot \mathbf{y}\|} \\ &= \frac{\nabla f(\mathbf{x}) + r_0 \nabla^2 f(\mathbf{x}) \cdot \mathbf{y}}{2\|\nabla f(\mathbf{x})\|}. \end{aligned} \quad (25)$$

The above vector is  $\frac{\rho r_0^2}{4\gamma_{\mathbf{x}}}$ -close to  $\frac{\nabla f(\mathbf{x} + r_0 \mathbf{y})}{2\|\nabla f(\mathbf{x})\|}$  by (17), and the error in above steps cumulates by at most  $\frac{6\rho r_0^2}{0.99\gamma_{\mathbf{x}}}$  using Lemma 6. In total  $\frac{6\rho r_0^2}{0.99\gamma_{\mathbf{x}}} + \frac{\rho r_0^2}{4\gamma_{\mathbf{x}}} \leq \frac{7\rho r_0^2}{\gamma_{\mathbf{x}}}$ .

Furthermore, this vector proportional to  $\nabla f(\mathbf{x} + r_0 \mathbf{y})$  that is  $\frac{\rho r_0^2}{4\gamma_{\mathbf{x}}}$ -close to (23) has norm at least  $(1 - 0.01)/2 = 0.495$  because the coefficient in (24) is positive, while in the equality above we have  $\|r_0 \nabla^2 f(\mathbf{x}) \cdot \mathbf{y}\| \leq \frac{\gamma_{\mathbf{x}}}{100}$ . Therefore, applying Lemma 5, the vector  $\tilde{\mathbf{g}}_1$  in (23) satisfies

$$\left\| \frac{\tilde{\mathbf{g}}_1}{\|\tilde{\mathbf{g}}_1\|} - \frac{\nabla f(\mathbf{x} + r_0 \mathbf{y})}{\|\nabla f(\mathbf{x} + r_0 \mathbf{y})\|} \right\| \leq \frac{29\rho r_0^2}{\gamma_{\mathbf{x}}}. \quad (26)$$

Following the same proof, we can prove that the vector

$$\begin{aligned} \tilde{\mathbf{g}}_{-1} := & \frac{\nabla f(\mathbf{x})}{\|\nabla f(\mathbf{x})\|} - \alpha \cdot \left( \sqrt{1 - \left\langle \frac{\nabla f(\mathbf{x} - r_0 \mathbf{y})}{\|\nabla f(\mathbf{x} - r_0 \mathbf{y})\|}, \frac{\nabla f(\mathbf{x})}{\|\nabla f(\mathbf{x})\|} \right\rangle^2} \frac{\nabla f(\mathbf{x} + r_0 \mathbf{y})}{\|\nabla f(\mathbf{x} + r_0 \mathbf{y})\|} \right. \\ & \left. - \sqrt{1 - \left\langle \frac{\nabla f(\mathbf{x} + r_0 \mathbf{y})}{\|\nabla f(\mathbf{x} + r_0 \mathbf{y})\|}, \frac{\nabla f(\mathbf{x})}{\|\nabla f(\mathbf{x})\|} \right\rangle^2} \frac{\nabla f(\mathbf{x} - r_0 \mathbf{y})}{\|\nabla f(\mathbf{x} - r_0 \mathbf{y})\|} \right) \end{aligned} \quad (27)$$

satisfies

$$\left\| \frac{\tilde{\mathbf{g}}_{-1}}{\|\tilde{\mathbf{g}}_{-1}\|} - \frac{\nabla f(\mathbf{x} - r_0 \mathbf{y})}{\|\nabla f(\mathbf{x} - r_0 \mathbf{y})\|} \right\| \leq \frac{29\rho r_0^2}{\gamma_{\mathbf{x}}}. \quad (28)$$

Furthermore, (25) implies that  $\tilde{\mathbf{g}}_1 - \tilde{\mathbf{g}}_{-1}$  is  $2 \cdot \frac{7\rho r_0^2}{\gamma_{\mathbf{x}}} = \frac{14\rho r_0^2}{\gamma_{\mathbf{x}}}$ -close to

$$\frac{\nabla f(\mathbf{x}) + r_0 \nabla^2 f(\mathbf{x}) \cdot \mathbf{y}}{2\|\nabla f(\mathbf{x})\|} - \frac{\nabla f(\mathbf{x}) - r_0 \nabla^2 f(\mathbf{x}) \cdot \mathbf{y}}{2\|\nabla f(\mathbf{x})\|} = \frac{r_0}{\|\nabla f(\mathbf{x})\|} \nabla^2 f(\mathbf{x}) \cdot \mathbf{y}. \quad (29)$$

Because  $\lambda_{\min}(\nabla^2 f(\mathbf{x})) \leq -\sqrt{\rho\epsilon}$  and  $|\mathbf{y}| \geq \gamma_{\mathbf{y}}$ ,  $\|\nabla^2 f(\mathbf{x}) \cdot \mathbf{y}\| \geq \sqrt{\rho\epsilon}\gamma_{\mathbf{y}}$ . Therefore, the RHS of (29) has norm at least  $\frac{r_0\sqrt{\rho\epsilon}\gamma_{\mathbf{y}}}{\gamma_{\mathbf{x}}}$ , and by Lemma 5 we have

$$\left\| \frac{\tilde{\mathbf{g}}_1 - \tilde{\mathbf{g}}_{-1}}{\|\tilde{\mathbf{g}}_1 - \tilde{\mathbf{g}}_{-1}\|} - \frac{\nabla^2 f(\mathbf{x}) \cdot \mathbf{y}}{\|\nabla^2 f(\mathbf{x}) \cdot \mathbf{y}\|} \right\| \leq \frac{14\rho r_0^2}{\gamma_{\mathbf{x}}} \frac{r_0\sqrt{\rho\epsilon}\gamma_{\mathbf{y}}}{\gamma_{\mathbf{x}}} = \frac{14r_0\sqrt{\rho}}{\sqrt{\epsilon}\gamma_{\mathbf{y}}}. \quad (30)$$

Finally, by Theorem 1 and our choice of the precision parameter, the error coming from running Comparison-GDE is:

$$\left\| \hat{\mathbf{g}}_0 - \frac{\nabla f(\mathbf{x})}{\|\nabla f(\mathbf{x})\|} \right\|, \left\| \hat{\mathbf{g}}_1 - \frac{\nabla f(\mathbf{x} + r_0 \mathbf{y})}{\|\nabla f(\mathbf{x} + r_0 \mathbf{y})\|} \right\|, \left\| \hat{\mathbf{g}}_{-1} - \frac{\nabla f(\mathbf{x} - r_0 \mathbf{y})}{\|\nabla f(\mathbf{x} - r_0 \mathbf{y})\|} \right\| \leq \frac{\rho r_0^2}{\gamma_{\mathbf{x}}}. \quad (31)$$

Combined with (26) and (28), we know that the vector  $\mathbf{g}$  we obtained in Algorithm 10 is

$$\frac{29\rho r_0^2}{\gamma_{\mathbf{x}}} + \frac{29\rho r_0^2}{\gamma_{\mathbf{x}}} + 3 \cdot \frac{\rho r_0^2}{\gamma_{\mathbf{x}}} = \frac{61\rho r_0^2}{\gamma_{\mathbf{x}}} \quad (32)$$

close to  $(\tilde{\mathbf{g}}_1 - \tilde{\mathbf{g}}_{-1})/2\alpha$ . Since  $\alpha \geq 1$  by (22), by Lemma 5 we have

$$\left\| \frac{\mathbf{g}}{\|\mathbf{g}\|} - \frac{\tilde{\mathbf{g}}_1 - \tilde{\mathbf{g}}_{-1}}{\|\tilde{\mathbf{g}}_1 - \tilde{\mathbf{g}}_{-1}\|} \right\| \leq \frac{61\rho r_0^2}{\gamma_{\mathbf{x}}}. \quad (33)$$

In total, all the errors we have accumulated are (30) and (33):

$$\left\| \frac{\mathbf{g}}{\|\mathbf{g}\|} - \frac{\nabla^2 f(\mathbf{x}) \cdot \mathbf{y}}{\|\nabla^2 f(\mathbf{x}) \cdot \mathbf{y}\|} \right\| \leq \frac{61\rho r_0^2}{\gamma_{\mathbf{x}}} + \frac{14r_0\sqrt{\rho}}{\sqrt{\epsilon}\gamma_{\mathbf{y}}}. \quad (34)$$

Our selection of  $r_0 = \min \left\{ \frac{\gamma_{\mathbf{x}}}{100L}, \frac{\gamma_{\mathbf{x}}}{100\rho}, \frac{\sqrt{\gamma_{\mathbf{x}}\delta}}{20\sqrt{\rho}}, \frac{\gamma_{\mathbf{y}}\delta\sqrt{\epsilon}}{20\sqrt{\rho}} \right\}$  can guarantee that (34) is at most  $\hat{\delta}$ .

In terms of query complexity, we made 3 calls to `Comparison-GDE`. By Theorem 1 and that our precision is

$$\frac{\rho r_0^2}{\gamma_{\mathbf{x}}} = \Omega \left( \frac{\gamma_{\mathbf{x}}\gamma_{\mathbf{y}}^2\epsilon\hat{\delta}^2}{\rho L^2} \right),$$

the total query complexity is  $O \left( n \log \left( n\rho L^2 / \gamma_{\mathbf{x}}\gamma_{\mathbf{y}}^2\epsilon\hat{\delta}^2 \right) \right)$ .  $\square$

Based on Lemma 14, we obtain the following result.

**Lemma 15.** *In the setting of Problem 4, for any  $\mathbf{x}$  satisfying*

$$\|\nabla f(\mathbf{x})\| \geq L \left( \frac{\pi\delta}{256n\mathcal{T}} \right)^2 \sqrt{\frac{\epsilon}{\rho}}, \quad \lambda_{\min}(\nabla^2 f(\mathbf{x})) \leq -\sqrt{\rho\epsilon},$$

*Algorithm 9 outputs a unit vector  $\hat{\mathbf{e}}$  satisfying*

$$\hat{\mathbf{e}}^\top \nabla^2 f(\mathbf{x}) \hat{\mathbf{e}} \leq -\sqrt{\rho\epsilon}/4,$$

*with success probability at least  $1 - \delta$  using*

$$O \left( \frac{L^2 n^{3/2}}{\delta\rho\epsilon} \log^2 \frac{nL}{\delta\sqrt{\rho\epsilon}} \right)$$

*queries.*

The proof of Lemma 15 is similar to the proof of Lemma 10. Without loss of generality we assume  $\mathbf{x} = \mathbf{0}$  by shifting  $\mathbb{R}^n$  such that  $\mathbf{x}$  is mapped to  $\mathbf{0}$ . We denote  $\mathbf{g}_t := \nabla^2 f(\mathbf{0}) \cdot \mathbf{y}_t$  for each iteration  $t \in [\mathcal{T}]$  of Algorithm 9.

**Lemma 16.** *In the setting of Problem 4, for any iteration  $t \in [\mathcal{T}]$  of Algorithm 9 we have*

$$|y_{t,1}| \geq \frac{\delta}{8} \sqrt{\frac{\pi}{n}} \quad (35)$$

*if  $|y_{0,1}| \geq \frac{\delta}{2} \sqrt{\frac{\pi}{n}}$  and  $\|\nabla f(\mathbf{0})\| \leq \frac{\delta r}{32} \sqrt{\frac{\pi\rho\epsilon}{n}}$ .*

*Proof.* We use recurrence to prove this lemma. In particular, assume

$$\frac{|y_{t,1}|}{\|\mathbf{y}_{t,\perp}\|} \geq \frac{\delta}{2} \sqrt{\frac{\pi}{n}} \left( 1 - \frac{1}{2\mathcal{T}} \right)^t \quad (36)$$

is true for all  $t \leq k$  for some  $k$ , which guarantees that

$$|y_{t,1}| \geq \frac{\delta}{4} \sqrt{\frac{\pi}{n}} \left( 1 - \frac{1}{2\mathcal{T}} \right)^t$$

Then for  $t = k + 1$ , we have

$$\bar{\mathbf{y}}_{k+1,\perp} = \mathbf{y}_{k,\perp} - \frac{\delta}{16L} \sqrt{\frac{\rho\epsilon}{n}} \cdot \hat{\mathbf{g}}_{k,\perp},$$

and

$$\|\bar{\mathbf{y}}_{k+1,\perp}\| \leq \left\| \mathbf{y}_{k,\perp} - \frac{\delta}{16L} \sqrt{\frac{\rho\epsilon}{n}} \cdot \frac{\mathbf{g}_{k,\perp}}{\|\mathbf{g}_k\|} \right\| + \frac{\delta}{16L} \sqrt{\frac{\rho\epsilon}{n}} \left\| \hat{\mathbf{g}}_{k,\perp} - \frac{\mathbf{g}_{k,\perp}}{\|\mathbf{g}_k\|} \right\|, \quad (37)$$

where

$$\frac{\delta}{16L} \sqrt{\frac{\rho\epsilon}{n}} \left\| \hat{\mathbf{g}}_{k,\perp} - \frac{\mathbf{g}_{k,\perp}}{\|\mathbf{g}_k\|} \right\| \leq \frac{\delta}{16L} \sqrt{\frac{\rho\epsilon}{n}} \left\| \hat{\mathbf{g}}_k - \frac{\mathbf{g}_k}{\|\mathbf{g}_k\|} \right\| \leq \frac{\delta \hat{\delta}}{16L} \sqrt{\frac{\rho\epsilon}{n}} \leq \frac{\delta}{64\mathcal{T}\sqrt{n}}.$$

by Lemma 14. Next, we proceed to bound the first term on the RHS of (37). Note that

$$\mathbf{g}_{k,\perp} = \nabla^2 f(\mathbf{0}) \mathbf{y}_{k,\perp} = \sum_{i=2}^n \lambda_i \langle \mathbf{y}_{k,\perp}, \mathbf{u}_i \rangle \mathbf{u}_i,$$

and

$$\mathbf{y}_{k,\perp} - \frac{\delta}{16L} \sqrt{\frac{\rho\epsilon}{n}} \cdot \frac{\mathbf{g}_{k,\perp}}{\|\mathbf{g}_k\|} = \sum_{i=2}^n \left( 1 - \frac{\delta}{16\|\mathbf{g}_k\|} \sqrt{\frac{\rho\epsilon}{n}} \frac{\lambda_i}{L} \right) \langle \mathbf{y}_{k,\perp}, \mathbf{u}_i \rangle \mathbf{u}_i,$$

where

$$\|\mathbf{g}_k\| \geq |g_{k,1}| \geq \sqrt{\rho\epsilon} |y_{k,1}| \geq \frac{\delta}{8} \sqrt{\frac{\pi}{n}}.$$

Consequently, we have

$$-1 \leq \frac{\delta}{16\|\mathbf{g}_k\|} \sqrt{\frac{\rho\epsilon}{n}} \frac{\lambda_i}{L} \leq 1, \quad \forall i = 1, \dots, n,$$

which leads to

$$\begin{aligned} \left\| \mathbf{y}_{k,\perp} - \frac{\delta}{16L} \sqrt{\frac{\rho\epsilon}{n}} \cdot \frac{\mathbf{g}_{k,\perp}}{\|\mathbf{g}_k\|} \right\| &\leq \left\| \sum_{i=2}^n \left( 1 + \frac{\delta\rho\epsilon}{16\|\mathbf{g}_k\|L\sqrt{n}} \right) \langle \mathbf{y}_{k,\perp}, \mathbf{u}_i \rangle \mathbf{u}_i \right\| \\ &\leq \left( 1 + \frac{\delta\rho\epsilon}{16\|\mathbf{g}_k\|L\sqrt{n}} \right) \|\mathbf{y}_{k,\perp}\|. \end{aligned}$$

Combined with (37), we can derive that

$$\|\bar{\mathbf{y}}_{k+1,\perp}\| \leq \left\| \mathbf{y}_{k,\perp} - \frac{\delta}{16L} \sqrt{\frac{\rho\epsilon}{n}} \cdot \frac{\mathbf{g}_{k,\perp}}{\|\mathbf{g}_k\|} \right\| + \frac{\delta}{16L} \sqrt{\frac{\rho\epsilon}{n}} \left\| \hat{\mathbf{g}}_{k,\perp} - \frac{\mathbf{g}_{k,\perp}}{\|\mathbf{g}_k\|} \right\| \quad (38)$$

$$\leq \left( 1 + \frac{\delta\rho\epsilon}{16\|\mathbf{g}_k\|L\sqrt{n}} \right) \|\mathbf{y}_{k,\perp}\| + \frac{\delta}{64\mathcal{T}\sqrt{n}}. \quad (39)$$

Similarly, we have

$$|\bar{y}_{k+1,1}| \geq \left| y_{k,1} - \frac{\delta}{16L} \sqrt{\frac{\rho\epsilon}{n}} \cdot \frac{g_{k,1}}{\|\mathbf{g}_k\|} \right| - \frac{\delta}{16L} \sqrt{\frac{\rho\epsilon}{n}} \left| \hat{g}_{k,1} - \frac{g_{k,1}}{\|\mathbf{g}_k\|} \right|, \quad (40)$$

where the second term on the RHS of (40) satisfies

$$\frac{\delta}{16L} \sqrt{\frac{\rho\epsilon}{n}} \left| \hat{g}_{k,1} - \frac{g_{k,1}}{\|\mathbf{g}_k\|} \right| \leq \frac{\delta}{16L} \sqrt{\frac{\rho\epsilon}{n}} \left\| \hat{\mathbf{g}}_k - \frac{\mathbf{g}_k}{\|\mathbf{g}_k\|} \right\| \leq \frac{\delta \hat{\delta}}{16L} \sqrt{\frac{\rho\epsilon}{n}} \leq \frac{\delta}{64\mathcal{T}\sqrt{n}},$$

by Lemma 14. Combined with (40), we can derive that

$$\begin{aligned} |\bar{y}_{k+1,1}| &\geq \left| y_{k,1} - \frac{\delta}{16L} \sqrt{\frac{\rho\epsilon}{n}} \cdot \frac{g_{k,1}}{\|\mathbf{g}_k\|} \right| - \frac{\delta}{16L} \sqrt{\frac{\rho\epsilon}{n}} \left| \hat{g}_{k,1} - \frac{g_{k,1}}{\|\mathbf{g}_k\|} \right| \\ &\geq \left( 1 + \frac{\delta\rho\epsilon}{16\|\mathbf{g}_k\|L\sqrt{n}} \right) |y_{k,1}| - \frac{\delta}{64\mathcal{T}\sqrt{n}}. \end{aligned}$$

Consequently,

$$\begin{aligned} \frac{|y_{k+1,1}|}{\|\mathbf{y}_{k+1,\perp}\|} &= \frac{|\bar{y}_{k+1,1}|}{\|\bar{\mathbf{y}}_{k+1,\perp}\|} \\ &\geq \frac{\left( 1 + \frac{\delta\rho\epsilon}{16\|\mathbf{g}_k\|L\sqrt{n}} \right) |y_{k,1}| - \frac{\delta}{64\mathcal{T}\sqrt{n}}}{\left( 1 + \frac{\delta\rho\epsilon}{16\|\mathbf{g}_k\|L\sqrt{n}} \right) \|\mathbf{y}_{k,\perp}\| + \frac{\delta}{64\mathcal{T}\sqrt{n}}}. \end{aligned}$$

Thus, if  $|y_{k,1}| \geq \frac{1}{2}$ , (36) is also true for  $t = k + 1$ . Otherwise, we have  $\|\mathbf{y}_{k,\perp}\| \geq \sqrt{3}/2$  and

$$\begin{aligned} \frac{|y_{k+1,1}|}{\|\mathbf{y}_{k+1,\perp}\|} &\geq \frac{\left(1 + \frac{\delta\rho\epsilon}{16\|\nabla f(\mathbf{z}_k)\|L\sqrt{n}}\right) |y_{k,1}| - \frac{\delta}{64\mathcal{T}\sqrt{n}}}{\left(1 + \frac{\delta\rho\epsilon}{16\|\mathbf{g}_k\|L\sqrt{n}}\right) \|\mathbf{y}_{k,\perp}\| + \frac{\delta}{64\mathcal{T}\sqrt{n}}} \\ &\geq \frac{\left(1 + \frac{\delta\rho\epsilon}{16\|\mathbf{g}_k\|L\sqrt{n}} - \frac{1}{8\mathcal{T}}\right) |y_{k,1}|}{\left(1 + \frac{\delta\rho\epsilon}{16\|\mathbf{g}_k\|L\sqrt{n}} + \frac{1}{8\mathcal{T}}\right) \|\mathbf{y}_{k,\perp}\|} \\ &\geq \left(1 - \frac{1}{2\mathcal{T}}\right) \frac{|y_{k,1}|}{\|\mathbf{y}_{k,\perp}\|} \geq \frac{\delta}{2} \sqrt{\frac{\pi}{n}} \left(1 - \frac{1}{2\mathcal{T}}\right)^{k+1}. \end{aligned}$$

Thus, we can conclude that (36) is true for all  $t \in [\mathcal{T}]$ . This completes the proof.  $\square$

**Lemma 17.** *In the setting of Problem 4, for any  $i$  with  $\lambda_i \geq -\frac{\sqrt{\rho\epsilon}}{2}$ , the  $\mathcal{T}$ -th iteration of Algorithm 9 satisfies*

$$\frac{|y_{\mathcal{T},i}|}{|y_{\mathcal{T},1}|} \leq \frac{(\rho\epsilon)^{1/4}}{4\sqrt{n}L} \quad (41)$$

if  $|y_{0,1}| \geq \frac{\delta}{2} \sqrt{\frac{\pi}{n}}$ .

*Proof.* For any  $t \in [\mathcal{T} - 1]$ , similar to (40) in the proof of Lemma 16, we have

$$\bar{y}_{t+1,i} = y_{t,i} - \frac{\delta}{16L} \sqrt{\frac{\rho\epsilon}{n}} \cdot \hat{g}_{t,i},$$

and

$$|\bar{y}_{t+1,i}| \leq \left| y_{t,i} - \frac{\delta}{16L} \sqrt{\frac{\rho\epsilon}{n}} \cdot \frac{g_{t,i}}{\|\mathbf{g}_t\|} \right| - \frac{\delta}{16L} \sqrt{\frac{\rho\epsilon}{n}} \left| \hat{g}_{t,i} - \frac{g_{t,i}}{\|\mathbf{g}_t\|} \right|, \quad (42)$$

where the second term on the RHS of (42) satisfies

$$\frac{\delta}{16L} \sqrt{\frac{\rho\epsilon}{n}} \left| \hat{g}_{t,i} - \frac{g_{t,i}}{\|\mathbf{g}_t\|} \right| \leq \frac{\delta}{16L} \sqrt{\frac{\rho\epsilon}{n}} \left\| \hat{\mathbf{g}}_t - \frac{\mathbf{g}_t}{\|\mathbf{g}_t\|} \right\| \leq \frac{\delta\hat{\delta}}{16L} \sqrt{\frac{\rho\epsilon}{n}} \leq \frac{\delta(\rho\epsilon)^{1/4}}{128\mathcal{T}n} \sqrt{\frac{\pi}{L}}$$

by Lemma 14. Moreover, the first term on the RHS of (42) satisfies

$$y_{t,i} - \frac{\delta}{16L} \sqrt{\frac{\rho\epsilon}{n}} \cdot \frac{g_{t,i}}{\|\mathbf{g}_t\|} = y_{t,i} - \frac{\delta}{16L} \sqrt{\frac{\rho\epsilon}{n}} \cdot \frac{\mathbf{u}_i^\top \nabla^2 f(\mathbf{0}) \mathbf{u}_i y_{t,i}}{\|\mathbf{g}_t\|} \leq \left(1 + \frac{\delta\rho\epsilon}{32\|\mathbf{g}_t\|L\sqrt{n}}\right) y_{t,i},$$

Consequently, we have

$$|\bar{y}_{t+1,i}| \leq \left(1 + \frac{\delta\rho\epsilon}{32\|\mathbf{g}_t\|L\sqrt{n}}\right) |y_{t,i}| + \frac{\delta(\rho\epsilon)^{1/4}}{128\mathcal{T}n} \sqrt{\frac{\pi}{L}}.$$

Meanwhile,

$$\begin{aligned} |\bar{y}_{t+1,1}| &\geq \left| y_{t,1} - \frac{\delta}{16L} \sqrt{\frac{\rho\epsilon}{n}} \cdot \frac{g_{t,1}}{\|\mathbf{g}_t\|} \right| - \frac{\delta}{16L} \sqrt{\frac{\rho\epsilon}{n}} \left| \hat{g}_{t,1} - \frac{g_{t,1}}{\|\mathbf{g}_t\|} \right| \\ &\geq \left(1 + \frac{\delta\rho\epsilon}{16\|\mathbf{g}_t\|L\sqrt{n}}\right) |y_{t,1}| - \frac{\delta(\rho\epsilon)^{1/4}}{128\mathcal{T}n} \sqrt{\frac{\pi}{L}} \\ &\geq \left(1 + \frac{\delta\rho\epsilon}{24\|\mathbf{g}_t\|L\sqrt{n}}\right) |y_{t,1}|, \end{aligned}$$

where the last inequality is due to the fact that  $|y_{t,1}| \geq \frac{\delta}{8} \sqrt{\frac{\pi}{n}}$  by Lemma 16. Hence, for any  $t \in [\mathcal{T} - 1]$  we have

$$\begin{aligned} \frac{|y_{t+1,i}|}{|y_{t+1,1}|} &= \frac{|\bar{y}_{t+1,i}|}{|\bar{y}_{t+1,1}|} \\ &\leq \frac{\left(1 + \frac{\delta\rho\epsilon}{32\|\mathbf{g}_t\|L\sqrt{n}}\right) |y_{t,i}| + \frac{\delta(\rho\epsilon)^{1/4}}{128\mathcal{T}n} \sqrt{\frac{\pi}{L}}}{\left(1 + \frac{\delta\rho\epsilon}{24\|\mathbf{g}_t\|L\sqrt{n}}\right) |y_{t,1}|} \\ &\leq \frac{\left(1 + \frac{\delta\rho\epsilon}{32\|\mathbf{g}_t\|L\sqrt{n}}\right) |y_{t,i}|}{\left(1 + \frac{\delta\rho\epsilon}{24\|\mathbf{g}_t\|L\sqrt{n}}\right) |y_{t,1}|} + \frac{(\rho\epsilon)^{1/4}}{8\mathcal{T}\sqrt{nL}} \\ &\leq \left(1 - \frac{\delta\rho\epsilon}{192\|\mathbf{g}_t\|L\sqrt{n}}\right) \frac{|y_{t,i}|}{|y_{t,1}|} + \frac{(\rho\epsilon)^{1/4}}{8\mathcal{T}\sqrt{nL}}. \end{aligned}$$

Since  $f$  is  $L$ -smooth, we have

$$\|\mathbf{g}_t\| \leq L\|\mathbf{y}_t\| \leq L,$$

which leads to

$$\begin{aligned} \frac{|y_{t+1,i}|}{|y_{t+1,1}|} &\leq \left(1 - \frac{\delta\rho\epsilon}{192\|\mathbf{g}_t\|L\sqrt{n}}\right) \frac{|y_{t,i}|}{|y_{t,1}|} + \frac{(\rho\epsilon)^{1/4}}{8\mathcal{T}\sqrt{nL}} \\ &\leq \left(1 - \frac{\delta\rho\epsilon}{192L^2\sqrt{n}}\right) \frac{|y_{t,i}|}{|y_{t,1}|} + \frac{(\rho\epsilon)^{1/4}}{8\mathcal{T}\sqrt{nL}}. \end{aligned}$$

Thus,

$$\begin{aligned} \frac{|y_{\mathcal{T},i}|}{|y_{\mathcal{T},1}|} &\leq \left(1 - \frac{\delta\rho\epsilon}{192L^2\sqrt{n}}\right)^{\mathcal{T}} \frac{|y_{0,i}|}{|y_{0,1}|} + \sum_{t=1}^{\mathcal{T}} \frac{(\rho\epsilon)^{1/4}}{6\mathcal{T}\sqrt{nL}} \left(1 - \frac{\delta\rho\epsilon}{192L^2\sqrt{n}}\right)^{\mathcal{T}-t} \\ &\leq \left(1 - \frac{\delta\rho\epsilon}{192L^2\sqrt{n}}\right)^{\mathcal{T}} \frac{|y_{0,i}|}{|y_{0,1}|} + \frac{(\rho\epsilon)^{1/4}}{8\sqrt{nL}} \leq \frac{(\rho\epsilon)^{1/4}}{4\sqrt{nL}}. \end{aligned}$$

□

Equipped with Lemma 17, we are now ready to prove Lemma 15.

*Proof of Lemma 15.* We consider the case where  $|y_{0,1}| \geq \frac{\delta}{2} \sqrt{\frac{\pi}{n}}$ , which happens with probability

$$\Pr\left\{|y_{0,1}| \geq \frac{\delta}{2} \sqrt{\frac{\pi}{n}}\right\} \geq 1 - \frac{\delta}{2} \sqrt{\frac{\pi}{n}} \cdot \frac{\text{Vol}(\mathcal{S}^{n-2})}{\text{Vol}(\mathcal{S}^{n-1})} \geq 1 - \delta.$$

In this case, by Lemma 17 we have

$$|y_{\mathcal{T},1}|^2 = \frac{|y_{\mathcal{T},1}|^2}{\sum_{i=1}^n |y_{\mathcal{T},i}|^2} = \left(1 + \sum_{i=2}^n \left(\frac{|y_{\mathcal{T},i}|}{|y_{\mathcal{T},1}|}\right)^2\right)^{-1} \geq \left(1 + \frac{\sqrt{\rho\epsilon}}{16L}\right)^{-1} \geq 1 - \frac{\sqrt{\rho\epsilon}}{8L},$$

and

$$\|\mathbf{y}_{\mathcal{T},\perp}\|^2 = 1 - |y_{\mathcal{T},1}|^2 \leq \frac{\sqrt{\rho\epsilon}}{8L}.$$

Let  $s$  be the smallest integer such that  $\lambda_s \geq 0$ . Then the output  $\hat{\mathbf{e}} = \mathbf{y}_{\mathcal{T}}$  of Algorithm 9 satisfies

$$\begin{aligned} \hat{\mathbf{e}}^\top \nabla^2 f(\mathbf{x}) \hat{\mathbf{e}} &= |y_{\mathcal{T},1}|^2 \mathbf{u}_1^\top \nabla^2 f(\mathbf{x}) \mathbf{u}_1 + \mathbf{y}_{\mathcal{T},\perp}^\top \nabla^2 f(\mathbf{x}) \mathbf{y}_{\mathcal{T},\perp} \\ &\leq -\sqrt{\rho\epsilon} \cdot |y_{\mathcal{T},1}|^2 + L \sum_{i=s}^d \|\mathbf{y}_{\mathcal{T},i}\|^2 \\ &\leq -\sqrt{\rho\epsilon} \cdot |y_{\mathcal{T},1}|^2 + L \|\mathbf{y}_{\mathcal{T},\perp}\|^2 \leq -\frac{\sqrt{\rho\epsilon}}{4}. \end{aligned}$$

The query complexity of Algorithm 9 only comes from the Hessian-vector product estimation step in Line 4, which equals

$$\mathcal{T} \cdot O(n \log(n\rho L^2/\gamma_{\mathbf{x}}\gamma_{\mathbf{y}}^2\epsilon\delta^2)) = O\left(\frac{L^2 n^{3/2}}{\delta\rho\epsilon} \log^2 \frac{nL}{\delta\sqrt{\rho\epsilon}}\right).$$

□

### C.3 PROOF OF LEMMA 4

*Proof.* By Lemma 10 and Lemma 15, at least one of the two unit vectors  $\mathbf{v}_1, \mathbf{v}_2$  is a negative curvature direction. Quantitatively, with probability at least  $1 - \delta$ , at least one of the following two inequalities is true:

$$\mathbf{v}_1^\top \nabla^2 f(\mathbf{z}) \mathbf{v}_1 \leq -\frac{\sqrt{\rho\epsilon}}{4}, \quad \mathbf{v}_2^\top \nabla^2 f(\mathbf{z}) \mathbf{v}_2 \leq -\frac{\sqrt{\rho\epsilon}}{4}.$$

WLOG we assume the first inequality is true. Denote  $\eta = \frac{1}{2}\sqrt{\frac{\epsilon}{\rho}}$ . Given that  $f$  is  $\rho$ -Hessian Lipschitz, we have

$$\begin{aligned} f(\mathbf{z}_{1,+}) &\leq f(\mathbf{z}) + \eta \langle \nabla f(\mathbf{z}), \mathbf{v}_1 \rangle + \int_0^\eta \left( \int_0^a \left( -\frac{\sqrt{\rho\epsilon}}{4} + \rho b \right) db \right) da \\ &= f(\mathbf{z}) + \eta \langle \nabla f(\mathbf{z}), \mathbf{v}_1 \rangle - \frac{1}{48} \sqrt{\frac{\epsilon^3}{\rho}}, \end{aligned}$$

and

$$\begin{aligned} f(\mathbf{z}_{1,-}) &\leq f(\mathbf{z}) - \eta \langle \nabla f(\mathbf{z}), \mathbf{v}_1 \rangle + \int_0^\eta \left( \int_0^a \left( -\frac{\sqrt{\rho\epsilon}}{4} + \rho b \right) db \right) da \\ &= f(\mathbf{z}) - \eta \langle \nabla f(\mathbf{z}), \mathbf{v}_1 \rangle - \frac{1}{48} \sqrt{\frac{\epsilon^3}{\rho}}. \end{aligned}$$

Hence,

$$\frac{f(\mathbf{z}_{1,+}) + f(\mathbf{z}_{1,-})}{2} \leq f(\mathbf{z}) - \frac{1}{48} \sqrt{\frac{\epsilon^3}{\rho}},$$

which leads to

$$f(\mathbf{z}_{\text{out}}) \leq \min\{f(\mathbf{z}_{1,+}), f(\mathbf{z}_{1,-})\} \leq f(\mathbf{z}) - \frac{1}{48} \sqrt{\frac{\epsilon^3}{\rho}}.$$

By Lemma 10 and Lemma 15, the query complexity of Algorithm 6 equals

$$O\left(\frac{L^2 n^{3/2}}{\delta\rho\epsilon} \log^2 \frac{nL}{\delta\sqrt{\rho\epsilon}}\right).$$

□

### C.4 ESCAPE FROM SADDLE POINT VIA NEGATIVE CURVATURE FINDING

**Lemma 18.** *In the setting of Problem 4, if the iterations  $\mathbf{x}_{s,0}, \dots, \mathbf{x}_{s,\mathcal{T}}$  of Algorithm 5 satisfy*

$$f(\mathbf{x}_{s,\mathcal{T}}) - f(\mathbf{x}_{s,0}) \geq -\frac{1}{48} \sqrt{\frac{\epsilon^3}{\rho}},$$

*then the number of  $\epsilon$ -FOSP among  $\mathbf{x}_{s,0}, \dots, \mathbf{x}_{s,\mathcal{T}}$  is at least  $\mathcal{T} - \frac{3L}{32\sqrt{\rho\epsilon}}$ .*

*Proof.* For any iteration  $t \in [\mathcal{T}]$  with  $\|\nabla f(\mathbf{x}_{s,t})\| > \epsilon$ , by Theorem 1 we have

$$\left\| \hat{\mathbf{g}}_t - \frac{\nabla f(\mathbf{x}_{s,t})}{\|\nabla f(\mathbf{x}_{s,t})\|} \right\| \leq \delta = \frac{1}{6},$$

indicating

$$\begin{aligned} f(\mathbf{x}_{s,t+1}) - f(\mathbf{x}_{s,t}) &\leq f(\mathbf{y}_{s,t}) - f(\mathbf{x}_{s,t}) \\ &\leq \langle \nabla f(\mathbf{x}_{s,t}), \mathbf{x}_{s,t+1} - \mathbf{x}_{s,t} \rangle + \frac{L}{2} \|\mathbf{x}_{s,t+1} - \mathbf{x}_{s,t}\|^2 \\ &\leq -\frac{\epsilon}{3L} \langle \nabla f(\mathbf{x}_{s,t}), \hat{\mathbf{g}}_t \rangle + \frac{L}{2} \left( \frac{\epsilon}{3L} \right)^2 \\ &\leq -\frac{\epsilon}{3L} \|\nabla f(\mathbf{x}_{s,t})\| (1 - \delta) + \frac{\epsilon^2}{18L} \leq -\frac{2\epsilon^2}{9L}. \end{aligned}$$

That is to say, for any  $t \in [\mathcal{T}]$  such that  $\mathbf{x}_{s,t}$  is not an  $\epsilon$ -FOSP, the function value will decrease at least  $\frac{2\epsilon^2}{9L}$  in this iteration. Moreover, given that

$$f(\mathbf{x}_{s,t+1}) = \min\{f(\mathbf{x}_{s,t}), f(\mathbf{y}_{s,t})\} \leq f(\mathbf{x}_{s,t})$$

and

$$f(\mathbf{x}_{s,0}) - f(\mathbf{x}_{s,\mathcal{T}}) \leq \frac{1}{48} \sqrt{\frac{\epsilon^3}{\rho}},$$

we can conclude that the number of  $\epsilon$ -FOSP among  $\mathbf{x}_{s,1}, \dots, \mathbf{x}_{s,\mathcal{T}}$  is at least

$$\mathcal{T} - \frac{1}{48} \sqrt{\frac{\epsilon^3}{\rho}} \cdot \frac{9L}{2\epsilon^2} = \mathcal{T} - \frac{3L}{32\sqrt{\rho\epsilon}}.$$

□

**Lemma 19.** In the setting of Problem 4, if there are less than  $\frac{8\mathcal{T}}{9}$   $\epsilon$ -SOSP among the iterations  $\mathbf{x}_{s,0}, \dots, \mathbf{x}_{s,\mathcal{T}}$  of Algorithm 5, with probability at least  $1 - (1 - p(1 - \delta))^{\mathcal{T}/18}$  we have

$$f(\mathbf{x}_{s+1,0}) - f(\mathbf{x}_{s,0}) \leq -\frac{1}{48} \sqrt{\frac{\epsilon^3}{\rho}}.$$

*Proof.* If  $f(\mathbf{x}_{s,\mathcal{T}}) - f(\mathbf{x}_{s,0}) \leq -\frac{1}{48} \sqrt{\frac{\epsilon^3}{\rho}}$ , we directly have

$$\begin{aligned} f(\mathbf{x}_{s+1,0}) - f(\mathbf{x}_{s,0}) &= \min\{f(\mathbf{x}_{s,0}), \dots, f(\mathbf{x}_{s,\mathcal{T}}), f(\mathbf{x}'_{s,0}), \dots, f(\mathbf{x}'_{s,\mathcal{T}})\} - f(\mathbf{x}_{s,0}) \\ &\leq f(\mathbf{x}_{s,\mathcal{T}}) - f(\mathbf{x}_{s,0}) \leq -\frac{1}{48} \sqrt{\frac{\epsilon^3}{\rho}}. \end{aligned}$$

Hence, we only need to prove the case with  $f(\mathbf{x}_{s+1,0}) - f(\mathbf{x}_{s,0}) > -\frac{1}{48} \sqrt{\frac{\epsilon^3}{\rho}}$ , where by Lemma 18 the number of  $\epsilon$ -FOSP among  $\mathbf{x}_{s,0}, \dots, \mathbf{x}_{s,\mathcal{T}}$  is at least  $\mathcal{T} - \frac{3L}{32\sqrt{\rho\epsilon}}$ . Since there are less than  $\frac{8\mathcal{T}}{9}$   $\epsilon$ -SOSP among the iterations  $\mathbf{x}_{s,0}, \dots, \mathbf{x}_{s,\mathcal{T}}$ , there exists

$$\mathcal{T} - \frac{3L}{32\sqrt{\rho\epsilon}} - \frac{8\mathcal{T}}{9} \geq \frac{\mathcal{T}}{18}$$

different values of  $t \in [\mathcal{T}]$  such that

$$\|\nabla f(\mathbf{x}_{s,t})\| \leq \epsilon, \quad \lambda_{\min}(\nabla^2 f(\mathbf{x})) \leq -\sqrt{\rho\epsilon}.$$

For each such  $t$ , with probability  $p$  the subroutine Comparison-NCD (Algorithm 6) is executed in this iteration. Conditioned on that, with probability at least  $1 - \delta$  its output  $\mathbf{x}'_{s,t}$  satisfies

$$f(\mathbf{x}'_{s,t}) - f(\mathbf{x}_{s,t}) \leq -\frac{1}{48} \sqrt{\frac{\epsilon^3}{\rho}}$$



by Lemma 4. Hence, with probability at least

$$1 - (1 - p(1 - \delta))^{\mathcal{T}/18},$$

there exists a  $t' \in [\mathcal{T}]$  with

$$f(\mathbf{x}'_{s,t'}) - f(\mathbf{x}_{s,t'}) \leq -\frac{1}{48} \sqrt{\frac{\epsilon^3}{\rho}},$$

which leads to

$$\begin{aligned} f(\mathbf{x}_{s+1,0}) - f(\mathbf{x}_{s,0}) &= \min\{f(\mathbf{x}_{s,0}), \dots, f(\mathbf{x}_{s,\mathcal{T}}), f(\mathbf{x}'_{s,0}), \dots, f(\mathbf{x}'_{s,\mathcal{T}})\} - f(\mathbf{x}_{s,0}) \\ &\leq f(\mathbf{x}'_{s,t'}) - f(\mathbf{x}_{s,t'}) \leq -\frac{1}{48} \sqrt{\frac{\epsilon^3}{\rho}}, \end{aligned}$$

where the second inequality is due to the fact that  $f(\mathbf{x}_{s,t'}) \leq f(\mathbf{x}_{s,0})$  for any possible value of  $t'$  in  $[\mathcal{T}]$ .  $\square$

*Proof of Theorem 5.* We assume for any  $s = 1, \dots, \mathcal{S}$  with  $\mathbf{x}_{s,0}, \dots, \mathbf{x}_{s,\mathcal{T}}$  containing less than  $\frac{8\mathcal{T}}{9}$   $\epsilon$ -SOSP we have

$$f(\mathbf{x}_{s+1,0}) - f(\mathbf{x}_{s,0}) \leq -\frac{1}{48} \sqrt{\frac{\epsilon^3}{\rho}}.$$

Given that there are at most  $\mathcal{S}$  different values of  $s$ , by Lemma 19, the probability of this assumption being true is at least

$$(1 - (1 - p(1 - \delta))^{\mathcal{T}/18})^{\mathcal{S}} \geq \frac{8}{9}. \quad (43)$$

Moreover, given that

$$\sum_{s=1}^{\mathcal{S}} f(\mathbf{x}_{s+1,0}) - f(\mathbf{x}_{s,0}) = f(\mathbf{x}_{\mathcal{S}+1,0}) - f(\mathbf{0}) \geq f^* - f(0) \geq -\Delta$$

there are at least  $\frac{27}{32}\mathcal{S}$  different values of  $s = 1, \dots, \mathcal{S}$  with

$$f(\mathbf{x}_{s+1,0}) - f(\mathbf{x}_{s,0}) \leq -\frac{1}{48} \sqrt{\frac{\epsilon^3}{\rho}},$$

as we have  $f(\mathbf{x}_{s+1,0}) \leq f(\mathbf{x}_{s,0})$  for any  $s$ . Hence, in this case the proportion of  $\epsilon$ -SOSP among all the iterations is at least

$$\frac{\frac{27}{32}\mathcal{S} \cdot \frac{8}{9}\mathcal{T}}{\mathcal{S}\mathcal{T}} = \frac{3}{4}.$$

Combined with (43), the overall success probability of outputting an  $\epsilon$ -SOSP is at least  $\frac{3}{4} \times \frac{8}{9} = \frac{2}{3}$ .

The query complexity of Algorithm 5 comes from both the gradient estimation step in Line 5 and the negative curvature descent step in Line 8. By Theorem 1, the query complexity of the first part equals

$$\mathcal{S}\mathcal{T} \cdot O(n \log(n/\delta)) = O\left(\frac{\Delta L^2 n^{3/2}}{\rho^{1/2} \epsilon^{5/2}} \log n\right),$$

whereas the expected query complexity of the second part equals

$$\mathcal{S}\mathcal{T}p \cdot O\left(\frac{L^2 n^{3/2}}{\delta \rho \epsilon} \log^2 \frac{nL}{\delta \sqrt{\rho \epsilon}}\right) = O\left(\frac{\Delta L^2 n^{3/2}}{\rho^{1/2} \epsilon^{5/2}} \log^3 \frac{nL}{\sqrt{\rho \epsilon}}\right).$$

Hence, the overall query complexity of Algorithm 5 equals

$$O\left(\frac{\Delta L^2 n^{3/2}}{\rho^{1/2} \epsilon^{5/2}} \log^3 \frac{nL}{\sqrt{\rho \epsilon}}\right).$$

$\square$
